# Supplementary material
Source: PubMed Central journal article supplement (PMC4981979)
Supplement: supp_JCO.2016.66.7220_Protocol_2016.667220.pdf [file supp_JCO.2016.66.7220_Protocol_2016.667220.pdf]

The following protocol information is provided solely to describe how the authors conducted the research underlying the published report associated with the following article:

**A randomized, prospective evaluation comparing intensity of lymphodepletion prior to adoptive transfer of tumor infiltrating lymphocytes for patients with metastatic melanoma.**

DOI: 10.1200/JCO.2016.66.7220

The information provided may not reflect the complete protocol or any previous amendments or modifications. As described in the Information for Contributors (<http://jco.ascopubs.org/site/ifc/protocol.xhtml>) only specific elements of the most recent version of the protocol are requested by JCO. The protocol information is not intended to replace good clinical judgment in selecting appropriate therapy and in determining drug doses, schedules, and dose modifications. The treating physician or other health care provider is responsible for determining the best treatment for the patient. ASCO and JCO assume no responsibility for any injury or damage to persons or property arising out of the use of these protocol materials or due to any errors or omissions. Individuals seeking additional information about the protocol are encouraged to consult with the corresponding author directly.

**Abbreviated Title: 1200 TBI TIL Randomized Study**

**CC Protocol Number: 11-C-0123I**  
**NCI Protocol Number: P10789**  
**IRB Submission Date: 12/27/2010**  
**Version Date: 07/01/2015**

Prospective Randomized Study of Cell Transfer Therapy for Metastatic Melanoma Using Short-Term Cultured Tumor Infiltrating Lymphocytes Plus IL-2 Following Either a Non-Myeloablative Lymphocyte Depleting Chemotherapy Regimen Alone or in Conjunction with 12Gy Total Body Irradiation (TBI)

**Principal Investigator:** Steven A. Rosenberg, M.D., Ph.D.  
Chief of Surgery, NCI  
Building 10, CRC, Room 3-3940  
Phone: 301-496-4164

**Associate Investigators:** Deborah Citrin, M.D., Radiation Oncology Branch, NCI  
Robert Somerville, Ph.D., Surgery Branch, NCI\*\*  
James C. Yang, M.D., Surgery Branch, NCI  
Richard M. Sherry, M.D., Surgery Branch, NCI  
Udai S. Kammula, M.D., Surgery Branch, NCI  
Stephanie Goff, M.D., Surgery Branch, NCI  
Christopher Klebanoff, M.D., Surgery Branch, NCI  
Nicholas P. Restifo, M.D., Surgery Branch, NCI\*\*  
David Stroncek, M.D., DTM, CC  
Lori McIntyre, R.N., OCD\*  
Marie Statler, R.N., OCD\*  
Monica Epstein, R.N., OCD\*  
Abigail Johnson, R.N., OCD\*  
Donald E. White, M.S., Surgery Branch, NCI  
Seth M. Steinberg, Ph.D., BDMS, NCI+\*\*  
Daniel Zlott, PharmD., Pharmacy Dept., NIH Clinical Center  
Mary Ann Toomey, R.N., Surgery Branch, NCI\*\*  
Arati Kamath, Ph.D., Leidos Biomedical Research, Inc.\*\*  
Debbie Ann Nathan, R.N., Surgery Branch, NCI\*\*  
Isaac Kriley, M.D., Surgery Branch, NCI  
Parisa Malekzadeh, M.D., Surgery Branch, NCI^  
Kasia Trebska-McGowan, M.D., Surgery Branch, NCI  
**Referral Contact:** Linda Williams, R.N., Surgery Branch, NCI\*\*  
Jessica Yingling, R.N. OCD\*  
Ellen Bodurian, R.N., OCD\*

+Biostatistics Data Management Section Center for Cancer Research  
National Cancer Institute, National Institutes of Health, Bethesda, Maryland  
\* Office of the Clinical Director, \*\* Not responsible for direct patient care, ^Under the Direct Supervision of the PI

**IND Information:**

|             |                                  |
|-------------|----------------------------------|
| Drug Name:  | Young TIL                        |
| IND Number: | 14265                            |
| Sponsor     | Steven A. Rosenberg, M.D., Ph.D. |

**Precis:****Background:**

- Adoptive cell therapy (ACT) using autologous tumor infiltrating lymphocytes can mediate the regression of bulky metastatic melanoma when administered along with high-dose aldesleukin (IL-2) following a non-myeloablative lymphodepleting chemotherapy preparative regimen consisting of cyclophosphamide and fludarabine.
- In a series of consecutive trials using this chemotherapy preparative regimen alone or with 2 Gy or 12 Gy total body irradiation (TBI) objective response rates using RECIST criteria were 49%, 52%, and 72%, respectively. Complete regression rates in these three consecutive trials were 12%, 20%, and 40%, respectively—strongly suggesting that the addition of TBI could improve the complete regression rate. Of the 20 complete regressions seen in this trial, 19 are on-going at 37 to 82 months.
- Because of the complexity of developing selected TIL for use in adoptive transfer, we have recently developed a simplified method for producing TIL that is more applicable to use in outside institutions. Utilizing “young TIL” cells (sometimes with CD8 purification) in 105 patients, the objective response rate was 34% with a 6.6 % incidence of complete regressions. All patients in this trial received the cyclophosphamide fludarabine regimen alone.
- Because of the strong suggestion that the addition of TBI to the chemotherapy regimen could increase durable, complete regression rates in patients with metastatic melanoma, we are now attempting to definitively determine whether the addition of TBI to the chemotherapy preparative regimen can improve complete response rates, and overall survival in patients receiving “young TIL”.

**Objectives:**

- To determine, in a prospective randomized trial, the complete response rate and survival of patients with metastatic melanoma receiving ACT using young TIL plus aldesleukin treatment following either a chemotherapy preparative regimen alone, or the same chemotherapy preparative regimen plus TBI.
- Response rate and progression free survival will be evaluated as a secondary endpoint, as will the toxicity of these two treatment regimens.

**Eligibility:**

Patients who are 18 years or older must have:

- Evaluable metastatic melanoma;
- Metastatic melanoma lesion suitable for surgical resection for the preparation of TIL;
- No contraindications to high-dose aldesleukin administration or total body irradiation;
- No concurrent major medical illnesses or any form of immunodeficiency

**Design:**

- Patients with metastatic melanoma will have lesions resected and after TIL growth is established patients will be prospectively randomized to receive ACT with young TIL plus aldesleukin following either a non-myeloablative chemotherapy preparative regimen or this same regimen plus TBI.

## Table of Contents

|             |                                                                    |           |
|-------------|--------------------------------------------------------------------|-----------|
| <b>1</b>    | <b>Introduction.....</b>                                           | <b>5</b>  |
| <b>1.1</b>  | <b>Study Objectives:.....</b>                                      | <b>5</b>  |
| <b>1.2</b>  | <b>Background and Rationale:.....</b>                              | <b>5</b>  |
| <b>2</b>    | <b>Eligibility Assessment and Enrollment .....</b>                 | <b>8</b>  |
| <b>2.1</b>  | <b>Eligibility Criteria .....</b>                                  | <b>8</b>  |
| <b>2.2</b>  | <b>Research Eligibility Evaluation.....</b>                        | <b>9</b>  |
| <b>2.3</b>  | <b>Patient Registration, Randomization and Stratification.....</b> | <b>10</b> |
| <b>3</b>    | <b>Study Implementation .....</b>                                  | <b>11</b> |
| <b>3.1</b>  | <b>Protocol Stopping Rules.....</b>                                | <b>11</b> |
| <b>3.2</b>  | <b>Autologous Stem Cell Collection .....</b>                       | <b>12</b> |
| <b>3.3</b>  | <b>Drug Administration:.....</b>                                   | <b>12</b> |
| <b>3.4</b>  | <b>Total Body Irradiation (TBI).....</b>                           | <b>14</b> |
| <b>3.5</b>  | <b>Infection Prophylaxis .....</b>                                 | <b>15</b> |
| <b>3.6</b>  | <b>Blood Product Support .....</b>                                 | <b>16</b> |
| <b>3.7</b>  | <b>Aldesleukin: Intravenous Administration.....</b>                | <b>16</b> |
| <b>3.8</b>  | <b>On Study Evaluation .....</b>                                   | <b>16</b> |
| <b>3.9</b>  | <b>Additional Research Evaluations .....</b>                       | <b>17</b> |
| <b>3.10</b> | <b>Post Treatment Evaluation:.....</b>                             | <b>19</b> |
| <b>4</b>    | <b>Supportive Care .....</b>                                       | <b>20</b> |
| <b>5</b>    | <b>Data Collection and Evaluation.....</b>                         | <b>21</b> |
| <b>5.1</b>  | <b>Response Criteria .....</b>                                     | <b>21</b> |
| <b>5.2</b>  | <b>Toxicity Criteria .....</b>                                     | <b>22</b> |
| <b>5.3</b>  | <b>Statistical Section.....</b>                                    | <b>23</b> |
| <b>5.4</b>  | <b>Data and Safety Monitoring Plan.....</b>                        | <b>25</b> |
| <b>5.5</b>  | <b>Clinical Trial Monitoring Plan.....</b>                         | <b>25</b> |
| <b>5.6</b>  | <b>Handling of Tissue Specimens for Research Purposes.....</b>     | <b>25</b> |
| <b>5.7</b>  | <b>Collaborator Studies: .....</b>                                 | <b>26</b> |
| <b>6</b>    | <b>Human Subjects Protections.....</b>                             | <b>26</b> |
| <b>6.1</b>  | <b>Rationale for Patient Selection .....</b>                       | <b>27</b> |
| <b>6.2</b>  | <b>Participation of Children .....</b>                             | <b>27</b> |
| <b>6.3</b>  | <b>Evaluation of Benefits and Risks.....</b>                       | <b>27</b> |
| <b>6.4</b>  | <b>Consent Document.....</b>                                       | <b>27</b> |
| <b>7</b>    | <b>Data Reporting .....</b>                                        | <b>28</b> |
| <b>7.1</b>  | <b>Definitions .....</b>                                           | <b>28</b> |
| <b>7.2</b>  | <b>NCI-IRB Reporting .....</b>                                     | <b>29</b> |

|             |                                                                                                          |           |
|-------------|----------------------------------------------------------------------------------------------------------|-----------|
| <b>7.3</b>  | <b>Routine Data Reporting:</b> .....                                                                     | <b>30</b> |
| <b>7.4</b>  | <b>Expected Adverse Events and Protocol-Specific Expedited Adverse Event Reporting Exclusions:</b> ..... | <b>30</b> |
| <b>7.5</b>  | <b>Serious Adverse Event Reporting to the FDA:</b> .....                                                 | <b>31</b> |
| <b>8</b>    | <b>Pharmaceutical Information</b> .....                                                                  | <b>31</b> |
| <b>8.1</b>  | <b>Aldesleukin (Interleukin-2, Proleukin, Recombinant Human Interleukin 2)</b> .....                     | <b>31</b> |
| <b>8.2</b>  | <b>Fludarabine</b> .....                                                                                 | <b>32</b> |
| <b>8.3</b>  | <b>Cyclophosphamide</b> .....                                                                            | <b>33</b> |
| <b>8.4</b>  | <b>Mesna (Sodium 2-mercaptoethanesulfonate, Mesnum, Mesnex, NSC-113891)</b> .....                        | <b>34</b> |
| <b>8.5</b>  | <b>Filgrastim (Granulocyte Colony-Stimulating Factor, G-CSF, Filgrastim, Neupogen)</b> .....             | <b>34</b> |
| <b>8.6</b>  | <b>Trimethoprim and Sulfamethoxazole Double Strength (TMP / SMX DS)</b> .....                            | <b>34</b> |
| <b>8.7</b>  | <b>Herpes Virus Prophylaxis</b> .....                                                                    | <b>34</b> |
| <b>8.8</b>  | <b>Fluconazole</b> .....                                                                                 | <b>35</b> |
| <b>8.9</b>  | <b>Cell Preparation</b> .....                                                                            | <b>35</b> |
| <b>8.10</b> | <b>OKT3</b> .....                                                                                        | <b>35</b> |
| <b>8.11</b> | <b>Support Medications</b> .....                                                                         | <b>36</b> |
| <b>9</b>    | <b>Figures, Tables &amp; Appendices</b> .....                                                            | <b>37</b> |
| <b>10</b>   | <b>Reference List</b> .....                                                                              | <b>53</b> |

# 1 Introduction

## 1.1 Study Objectives:

### 1.1.1 Primary objective:

- a) To compare in a prospective randomized trial the complete response rate and survival in patients with metastatic melanoma receiving adoptive cell transfer (ACT) using young TIL plus aldesleukin treatment following a preparative regimen consisting of lymphodepleting chemotherapy with or without total body irradiation.

### 1.1.2 Secondary objectives:

- a) To determine response rates and progression free survival in patients in the two treatment arms.
- b) To determine the toxicity of these two treatment regimens.

## 1.2 Background and Rationale:

Melanoma is the sixth leading cancer in both men and women<sup>1</sup>. Metastatic melanoma has a poor prognosis with five-year survival of less than 5%. FDA-approved treatments for metastatic melanoma include aldesleukin and dacarbazine chemotherapy. Aldesleukin has an objective clinical response rate of about 16% and a complete response rate of 6%<sup>2</sup>. It is the only treatment known to cure some patients with metastatic melanoma. Dacarbazine-based chemotherapy has a clinical response rate of up to 20% but almost no complete responders or long-term survivors<sup>3</sup>. With the incidence of melanoma increasing in the United States, more effective treatment for metastatic melanoma is needed. Previous studies in animal models demonstrated that the cellular arm of the immune system plays an important role in tumor surveillance and may be recruited to destroy tumor<sup>4</sup>. Therefore, most therapeutic strategies focusing on immunotherapy against metastatic melanoma have focused on the ability of effector T-cells to mediate tumor destruction.

The Surgery Branch of the National Cancer Institute has pioneered ACT therapy for the treatment of patients with metastatic melanoma. We have reported the results of ACT therapy in 93 patients with metastatic melanoma who received autologous TIL following a lymphodepleting regimen plus aldesleukin administration.<sup>5</sup> Forty-three patients received a non-myeloablative chemotherapy consisting of 60 mg/kg cyclophosphamide qd x 2 and 25mg/m<sup>2</sup> fludarabine qd x 5 prior to cell transfer and aldesleukin administration. Twenty-five patients each also received the same chemotherapy agents in conjunction with either 2 or 12 Gy whole body irradiation prior to cell infusion and aldesleukin administration. The overall objective response rate using RECIST criteria in these 93 patients was 56%. The characteristics of these patients are shown in Table 1, and the toxicities shown in Table 2 for the TBI studies (04-C-0288, 06-C-0136) and Table 3 for the initial study without TBI (99-C-0158). There was one treatment related death in these 93 patients which occurred in a patient in the 2 Gy trial who had an undetected diverticular abscess prior to beginning therapy. In the 12 Gy study, five patients had hematuria and elevated creatinine levels. Four of these patients underwent a renal biopsy which indicated thrombotic microangiopathy. The consulting nephrologists indicated that they believed this toxicity would progress to renal failure and all these patients would eventually need dialysis. However, this has not occurred and all 5 patients are doing well.

The objective and complete response rates in these three consecutive trials are shown in Table 4. The objective response rates (RECIST) were 49%, 52%, and 72% and the complete response rates were 12%, 20%, and 40% in the NMA study, 2 Gy study and 12 Gy study, respectively. Of the 20 complete responders in the three trials, 19 are ongoing from 37 to 82 months. These represent by far the highest complete response rates seen in patients with metastatic melanoma (Table 5). There appeared to be an increase in survival with increasing

lymphodepletion although the consecutive nature of these non-randomized trials and possible selection bias of patients entering the trials cause doubt concerning the validity of this conclusion (Figure 1 and 2). Of the 52 responding patients in this trial, 42 were previously shown to be refractory to aldesleukin therapy and 21 were refractory to prior aldesleukin plus chemotherapy.

Despite this high rate of objective responses in previously treated patients, ACT is available only in the Surgery Branch, NCI and although two other institutions have begun to explore ACT therapy very limited numbers of patients have been treated elsewhere. The generation of TIL is time consuming, expensive and labor intensive. In addition, the costs for cell preparation as well as patient treatment are not covered by third party payers and these factors have discouraged the application of the ACT approach. In the original clinical trials, all patients received highly selected TIL, grown from multiple individual cultures with expansion of cultures shown to have specific reactivity against the autologous tumor or HLA matched tissue culture lines. This requirement substantially increased the difficulty in generating the appropriate reagents necessary to treat a large number of patients.

Because of the difficulties in generating highly selected reactive TIL we have put considerable effort into the development of techniques for the generation of effective TIL using procedures that do not require the extensive laboratory manipulations and testing required to develop highly selective TIL. In addition, intensive post-hoc analysis of some TIL cultures revealed tumor recognition that was not discovered in time to treat patients. This revealed that some TIL were considered “non-reactive” due to inadequacies in current assay methods.

Furthermore, murine and human evidence suggest that TIL cultured for shorter times (young TIL) may have better in vivo activity against tumors than extensively cultured TIL. In the initial report of the treatment of melanoma patients with adoptive transfer of TIL, we noted that patients treated with TIL from younger cultures had a higher frequency of clinical response to treatment than patients treated with TIL from older cultures ( $p = 0.0001$ )<sup>6</sup>. More recent studies examining the role of telomere length support this hypothesis. Differentiation and expansion of T cells is associated with telomere shortening<sup>7,8</sup> and with altered and loss of cell functions, including proliferation<sup>9,10</sup>. Zhou et. al. reported that TIL which were associated with objective clinical responses in treated patients had longer telomere lengths than TIL that were not associated with clinical responses ( $p < 0.01$ )<sup>11</sup>. TIL which persisted in vivo had longer telomere lengths than TIL which did not persist ( $p < 0.001$ ).

To determine the relationship between telomere length and time in culture, we measured telomere lengths of 495 TIL cultures generated from 48 consecutive patients by quantitative fluorescent in-situ hybridization (QFISH)<sup>12</sup>. The TIL were evaluated after eight to 56 days in culture. Figure 3 shows the close relationship between the age of TIL in culture (days) and their mean telomere length (kb). Though the telomere lengths varied widely, there was a strong inverse correlation between time in culture and telomere length of TIL ( $p < 0.001$ ). This observation is consistent with earlier observations that shorter time in culture is associated with improved response and improved response is associated with longer telomere lengths.

The hypothesis that younger TIL have improved in vivo survival and anti-tumor activity is corroborated by studies demonstrating that younger T cells have phenotypes with more favorable characteristics for in vivo persistence and antitumor activity. CD27 and CD28 are associated with proliferation and survival of T cells and are often used as markers of less-differentiated T cells<sup>13</sup>. Huang, et al reported that T-cell clonotypes with long-term in vivo persistence expressed higher levels of CD27 and CD28 than clonotypes with short-term persistence<sup>14</sup>. In a murine model of adoptive immunotherapy, Gattinoni et al demonstrated that the differentiation of effector T cells in culture had a severe negative effect on their capacity to function in vivo, and T cells expressing higher levels of CD27 had better in vivo antitumor activity than CD27-low cells<sup>15</sup>.

We thus developed an approach to rapidly generate TIL for treatment that involved growth of the entire complement of infiltrating lymphocytes for about two weeks and then expanding them to numbers sufficient for cell treatment. We called these cells “young” TIL. We studied the expression of CD27 and CD28 in young and standard TIL to examine the differences in phenotypic expression of these TIL<sup>12</sup>. Matched pairs of young TIL (mean age = 14 days) and standard TIL (mean age = 31 days) were generated from 14 tumor specimens. Expression of CD27 and CD28 as well as CD3, CD4, and CD8 were measured in both sets of TIL by fluorescent-activated cell sorting (FACS). Figure 4 shows representative FACS plots comparing the phenotypic expression of one young TIL culture with its matched standard TIL culture. Figure 5 demonstrates the differences in phenotypic expression of CD27 and CD28 by young and standard TIL. Young TIL have significantly higher expression of CD27 ( $p < 0.0001$ ) and CD28 ( $p < 0.003$ ) than standard TIL. In addition, FACS analysis of gated CD8+ cells from these TIL populations demonstrated a strong relationship between culture age and the expression of CD27 and CD28. These observations suggested that younger effector T cells have phenotypic expression of CD27 and CD28 which may indicate better in vivo proliferation, survival, and antitumor activity compared to older effector T cells.

A potential advantage of the use of this simpler method of producing TIL is that they will be more heterogeneous in their reactivity than highly selected TIL which have grown for longer periods of time. Another major advantage of the young TIL procedure is that the great majority of patients with resectable lesions can be treated. Thus, young TIL can be successfully grown from approximately 80% of all patients with resectable lesions. This high rate of cell production makes it possible to treat the great majority of patients with resectable lesions that come to the Surgery Branch for treatment.

We have performed a series of clinical trials to evaluate ACT using these young TIL preparations. In the first of these consecutive trials, 24 patients were treated with young TIL and in a second cohort, 39 patients were treated with young TIL that had been enriched for CD8+ cells. Although there was a suggestion that CD8 enriched young TIL gave higher response rates, we then performed a prospective randomized trial in which patients were randomized to receive either bulk young TIL or CD8 enriched young TIL. This trial has almost completed accrual and there is no suggestion of a difference in either overall response rates, complete response rates, or toxicities between the young TIL and CD8 enriched young TIL arms. The CD8 enrichment procedure can be quite expensive, including the use of the GMP quality Miltenyi separation apparatus. Thus, for future trials we will be using bulk young TIL. Since there were no differences between these two cell preparations, combined data of 105 patients that received young TIL or CD8 enriched young TIL are presented. In this combined group of 105 patients, all of whom received the cyclophosphamide fludarabine alone non-myeloablative preparative regimen, the objective response rate was 34.3% with 6.6% complete regressions. There is no significant difference in overall or complete response rates in patients receiving young TIL or the selected TIL used in previous trials ( $p=0.14$  and  $p=0.33$ , respectively) in patients receiving the same chemotherapy non-myeloablative preparative regimen alone. The toxicity profile is also not significantly different than that using highly selected TIL. A post-hoc analysis of the activity of young TIL in-vitro revealed that many of these preparations had specific anti-tumor activity quite similar to that of the selected TIL used in prior trials. A pilot trial was conducted in 23 patients using young TIL and aldesleukin following cyclophosphamide/fludarabine and a 6 Gy intermediate dose of TBI. Objective responses were seen in 48% of patients with 13% of patients experiencing a complete regression. This complete regression was double the 6.6% complete regression rate in patients receiving young TIL and the chemotherapy preparative regimen alone. Toxicities were similar to that in the trials without TBI.



Interestingly, 2 additional groups have now reported their results utilizing the cyclophosphamide/fludarabine non-myeloablative preparative regimen followed by young TIL and IL-2 administration. Besser et al., treated 31 patients with an objective response rate of 48.4% and a complete regression rate of 12.9 %. Joseph, et al., reported at the last meeting of the International Society for the Biologic Therapy of Cancer on 25 patients treated with young TIL with an objective response rate of 52% with 4% complete regressions. Thus, the conglomerate data available concerning the use of young TIL and the chemotherapy alone preparative regimen in 161 patients revealed an objective response rate of 39.8 % with a 7.5 % incidence of complete regressions.

In summary, this data reveals that the results of the use of young TIL is quite similar to that of the previous trials with selected TIL utilizing the cyclophosphamide fludarabine preparative regimen. In our previously published trials using selected TIL, the complete regression rate using the chemotherapy preparative regimen alone was 11.6% compared to 40% when 12Gy TBI was (p2=0.01). Thus, in the current trial we will attempt to definitively answer the question as to whether the 12 Gy TBI does indeed improve results by prospectively randomizing patients to receive TIL plus IL-2 following either the chemotherapy preparative regimen alone or the chemotherapy/12 Gy TBI regimen.

## 2 Eligibility Assessment and Enrollment

### 2.1 Eligibility Criteria

#### 2.1.1 Inclusion Criteria

- a. Measurable metastatic melanoma with at least one lesion that is resectable for TIL generation. The lesion must be of at least 1 cm in diameter that can be surgically removed with minimal morbidity (defined as any operation for which expected hospitalization  $\leq$  7 days).
- b. Patients with 3 or less brain metastases are eligible. **Note:** If lesions are symptomatic or greater than or equal to 1 cm each, these lesions must have been treated and stable for 3 months for the patient to be eligible.
- c. Greater than or equal to 18 years of age and less than or equal to 66 years of age.
- d. Willing to practice birth control during treatment and for four months after receiving all protocol related therapy.
- e. Life expectancy of greater than three months
- f. Willing to sign a durable power of attorney.
- g. Able to understand and sign the Informed Consent Document
- h. Clinical performance status of ECOG 0 or 1.
- i. Hematology:
  - Absolute neutrophil count greater than 1000/mm<sup>3</sup>
  - Hemoglobin greater than 8.0 g/dl
  - Platelet count greater than 100,000/mm<sup>3</sup>
- j. Serology:
  - Seronegative for HIV antibody. (The experimental treatment being evaluated in this protocol depends on an intact immune system. Patients who are HIV seropositive can have decreased immune competence and thus be less responsive to the experimental treatment and more susceptible to its toxicities.)
  - Seronegative for hepatitis B antigen, or hepatitis C antibody or antigen.
- k. Chemistry:

- Serum ALT/AST less than three times the upper limit of normal.
- Calculated creatinine clearance (eGFR) > 50 ml/min.
- Total bilirubin less than or equal to 2 mg/dl, except in patients with Gilbert's Syndrome who must have a total bilirubin less than 3 mg/dl.

l. More than four weeks must have elapsed since any prior systemic therapy at the time of randomization, and patients' toxicities must have recovered to a grade 1 or less (except for alopecia or vitiligo). Patients must have stable or progressing disease after prior treatment.

**Note:** Patients may have undergone minor surgical procedures within the past 3 weeks, as long as all toxicities have recovered to grade 1 or less or as specified in the eligibility criteria in Section 2.1.1.

m. Six weeks must have elapsed since any prior anti-CTLA4 antibody therapy to allow antibody levels to decline.

Note: Patients who have previously received ipilimumab or tremelimumab, anti-PD1 or anti-PD-L1 antibodies, and have documented GI toxicity must have a normal colonoscopy with normal colonic biopsies.

### 2.1.2 **Exclusion Criteria**

- a. Prior cell transfer therapy which included a non-myeloablative or myeloablative chemotherapy regimen.
- b. Women of child-bearing potential who are pregnant or breastfeeding because of the potentially dangerous effects of the preparative chemotherapy on the fetus or infant.
- c. Systemic steroid therapy requirement.
- d. Active systemic infections, coagulation disorders or other active major medical illnesses of the cardiovascular, respiratory or immune system, as evidenced by a positive stress thallium or comparable test, myocardial infarction, cardiac arrhythmias, obstructive or restrictive pulmonary disease.
- e. Any form of primary immunodeficiency (such as Severe Combined Immunodeficiency Disease and AIDS).
- f. Opportunistic infections (The experimental treatment being evaluated in this protocol depends on an intact immune system. Patients who have decreased immune competence may be less responsive to the experimental treatment and more susceptible to its toxicities.)
- g. History of severe immediate hypersensitivity reaction to any of the agents used in this study.
- h. History of coronary revascularization or ischemic symptoms.
- i. Any patient known to have an LVEF less than or equal to 45%.
- j. In patients > 60 years old, documented LVEF of less than or equal to 45%.
- k. Documented FEV1 less than or equal to 60% predicted tested in patients with:
  - A prolonged history of cigarette smoking (20 pk/year of smoking within the past 2 years).
  - Symptoms of respiratory dysfunction
    - l. Prior radiation therapy that, in the judgment of the radiation oncologist, precludes the administration of total body irradiation.

### 2.2 **Research Eligibility Evaluation**

### **2.2.1 Within 2 months prior to randomization:**

- a. HIV antibody titer and Hb<sub>s</sub>AG determination, anti HCV (may be performed within 3 months of chemotherapy start date)
- b. Anti CMV antibody titer, HSV serology, and EBV panel. (may be performed within 3 months of chemotherapy start; patients who are known to be positive for any of the above do not need to be retested).
- c. Verification that HLA typing is completed (testing is permitted to be conducted at any time prior to this point).
- d. Stress cardiac (MUGA or echocardiogram) in all patients > 60 years old regardless of history, and in patients meeting requirements noted in Section 2.1.2i.
- e. Pulmonary evaluation (PFTs) for patients meeting requirements in Section 2.1.2.k.
- f. Colonoscopy for patients meeting requirements noted in Section 2.1.1.n.

### **2.2.2 Within 3 weeks prior to randomization AND treatment:**

**Note:** the following evaluations should be repeated for safety if treatment will not begin within 3 week of randomization.

- a. Complete physical examination including height, weight and vital signs and eye exam, noting in detail the exact size and location of any lesions that exist. (Note: patient history may be obtained within 8 weeks)
- b. Chest x-ray
- c. EKG
- d. Baseline CT of the chest, abdomen and pelvis, and brain MRI to evaluate the status of disease. Additional scans and x-rays may be performed if clinically indicated based on patients' signs and symptoms.
- e. Chem 20 [Sodium (Na), Potassium (K), Chloride (Cl), Total CO<sub>2</sub>(bicarbonate), Creatinine, Glucose, Urea nitrogen (BUN), Albumin, Calcium total, Magnesium total (Mg), Inorganic Phosphorus, Alkaline Phosphatase, ALT/GPT, AST/GOT, Total Bilirubin, Direct Bilirubin, LD, Total Protein, Total CK, Uric Acid]and thyroid blood chemistry panel.
- f. CBC, differential, PT/PTT, platelet count
- g. Urinalysis and culture, if indicated
- h. Calculated creatinine clearance

### **2.2.3 Within 7 days prior to Treatment**

- i. β-HCG pregnancy test (serum or urine) on all women of child-bearing potential.
- j. ECOG

## **2.3 Patient Registration, Randomization and Stratification**

Patients will be registered by the clinical fellow or research nurse at the time that they enter the study by faxing a completed eligibility checklist to the Central Registration Office (CRO) at 301-480-0757. When approximately  $5 \times 10^8$  cells are available, patients will enter the study, be registered, and then stratified by M1a versus M1b and M1c. Following stratification, patient will be randomized to receive the non-myeloablative chemotherapy regimen of cyclophosphamide and fludarabine, young TIL and high dose aldesleukin (arm 1) or the same regimen plus 12 Gy total body irradiation (TBI). Randomization will be conducted a 1:1 fashion using variable block sizes. Written confirmation of registration to the protocol and the randomization arm selected will be obtained from the CRO and placed on the patient's research record.

### **3 Study Implementation**

#### **Overall Schema**

Patients with evaluable metastatic melanoma will undergo resection of tumor under protocol 03-C-0277. Patients with evaluable metastatic melanoma who have TIL successfully growing from a metastatic lesion will be prospectively randomized to arm 1 or arm 2 as described in Section 2.3. TIL will be grown and expanded for this trial according to standard operating procedures submitted in the IND. Volunteers will also undergo apheresis to obtain mononuclear cells to be used as feeder cells in cell culture according to protocol 03-C-0277. The procedures used are the same as those in all prior ACT protocols and are in routine use in the Department of Transfusion Medicine in the Clinical Center. Separate consents will be obtained from all apheresis volunteers. TIL cultures will be monitored regularly and when approximately  $5 \times 10^8$  cells are available the cells will undergo a rapid expansion. Prior to starting the rapid expansion, patients will be randomized. Patients randomized to TBI (Arm 2) will undergo collection of CD34+ hematopoietic stem cells as indicated in 03-C-0277 prior to beginning the preparative regimen. Prior to the start of the preparative regimen (approximately one week prior to infusion) TIL will be assessed for potency by interferon gamma release as specified in the Certificate of Analysis shown in Appendix 1.

Once cells exceed the potency requirement and are projected to exceed the minimum number specified in the COA (approximately 7 days after the REP procedure has been initiated), the patient will receive the lymphocyte depleting preparative regimen, followed by infusion of between  $1 \times 10^9$  to  $2 \times 10^{11}$  lymphocytes and the administration of the FDA approved standard regimen of aldesleukin at 720,000 IU/kg every eight hours to tolerance starting within 24 hours of cell infusion. Patients will be evaluated for response approximately 4-6 weeks following the completion of aldesleukin. Patients will receive one course of treatment. The start date of the course will be the start date of the chemotherapy; the end date will be the date of the first post-treatment evaluation.

Patients who are randomized to the TBI arm for whom the MINIMUM dose of CD34+ cells cannot be obtained will cross over to the chemotherapy preparative regimen without TBI arm (arm 1).

#### **3.1 Protocol Stopping Rules**

The study may be halted if any of the following conditions are met:

- 1) If 1 or more treatment related death occurs in either arm , we will promptly discuss this the protocol with the NCI IRB and the FDA but we may not immediately stop accrual.
- 2) The study will be halted pending discussions with the FDA and NCI IRB if the following conditions are met:
  - Two or more patients remain neutropenic (grade 3 or 4 ANC) 4 weeks following treatment.
  - Two or more patients remain thrombocytopenic (grade 3 or 4 platelets) 8 weeks following treatment.
  - If 2 or more patients have a greater than or equal to grade 3 creatinine level at 3 months post treatment.
- 3) The NCI DSMB futility evaluation determines that the trial is unlikely to find an effect at the 0.025 two-tailed significance level with continued accrual, based on the fraction surviving at one year.

- 4) The NCI DSMB efficacy evaluation determines that the p-value at the interim point (based on approximately 56 total patients enrolled and followed for 6 months) is  $<0.0054$ , then the trial will stop accrual for better than expected efficacy.

### **3.2 Autologous Stem Cell Collection**

Prior to beginning the preparative regimen, patients randomized to the TBI (Arm 2) will have stem cells collected and stored for re-infusion after the myeloablation and cell therapy as per protocol 03-C-0277. Patients will receive filgrastim at 8 mcg/kg dose BID (total = 16 mcg/kg/day) by subcutaneous injection for 5 days. The morning dose of filgrastim will be given at approximately 7:00 am each day, except for the last morning dose which will be at 5 am. Eleven hours prior to the apheresis procedure, a single dose of plerixafor at 240  $\mu\text{g}/\text{kg}$  may be administered by SQ injection to improve stem cell mobilization. Stem cells will be collected by apheresis.

Autologous apheresis will start on the fifth day of filgrastim administration, and filgrastim and plerixafor administration and apheresis will be repeated one more day if necessary to achieve a sufficient dose of CD34+ cells after ex vivo processing (Miltenyi ClinicMACs). For each daily apheresis a blood volume of 15- 25 liters of blood will be processed, using ACD-A anticoagulation, peripheral or central venous access, and calcium replacement as needed, per standard operating procedure of the NIH Clinical Center DTM. Sufficient CD34+ cell doses after Miltenyi ClinicMACs positive selection are defined as a TARGET of  $> 4 \times 10^6/\text{kg}$  recipient weight, and a MINIMUM of  $\geq 2 \times 10^6/\text{kg}$  recipient weight. Patients who do not reach the MINIMUM dose of selected CD34+ cells after two apheresis collections may be considered for a second cycle of filgrastim mobilization and apheresis collections.

If the MINIMUM dose of CD34+ cells has not been reached after 2 cycles of mobilization and collection, the patient in the TBI arm will receive the chemotherapy preparative regimen without TBI.

CD34+ cells will be processed and cryopreserved according to DTM policy and procedure until needed for cell infusion.

### **3.3 Drug Administration:**

Treatment schedule will be according to the following schedule (See Table 3.2). Only patients in arm 2 will receive 12Gy TBI. (Times are offered as examples and may be changed as long as a similar time relationship between administrations of the drugs is maintained. Study medication start times for drugs given once daily may be within 2 hours of the scheduled time. All other medications may be given +/- one hour of the scheduled time; the length of administration may be +/- 15 minutes. Administration of diuretics, electrolyte monitoring and replacement, and hydration should all be performed as clinically indicated – the times noted below are offered only as examples.)

#### **3.3.1 Preparative Regimen:**

The following will comprise a course of therapy for Day -7 through day 2:

##### Day -7 and -6

1 am: Hydrate: Begin hydration with 0.9% Sodium Chloride Injection containing 10 meq/L of potassium chloride at 2.6 ml/kg/hr (starting 11 hours pre-cyclophosphamide and continue hydration until 24 hours after last cyclophosphamide infusion). At any time during the preparative regimen, if the urine output  $<1.5 \text{ ml}/\text{kg}/\text{hr}$  or if body weight  $>2 \text{ kg}$  over pre-

cyclophosphamide value, furosemide 10-20 mg IV maybe administered. Serum potassium should be monitored and treated as indicated following administration of furosemide.

11 am: Ondansetron (0.15 mg/kg/dose [*rounded to the nearest even mg dose between 8 mg and 16 mg based on patient weight*]) IV q 8 hours X 3 days) will be given for nausea.

Furosemide 20 mg IV.

12 pm (NOON):

Cyclophosphamide 60 mg/kg/day X 2 days IV in 250 ml D5W with mesna 15 mg/kg/day over 1 hr X 2 days. If the patient is obese (BMI > 35) drug dosage will be calculated using practical weight as described in Appendix 2.

1 pm Begin mesna infusion at 3 mg/kg/hour intravenously diluted in a suitable diluent (see pharmaceutical section) over 23 hours after each cyclophosphamide dose. If the patient is obese (BMI > 35) drug dosage will be calculated using practical weight as described in Appendix 2.

#### Day -7 to Day-3

Fludarabine 25 mg/m<sup>2</sup>/day IVPB daily over 15-30 minutes for 5 days.

If the patient is obese (BMI > 35) drug dosage will be calculated using practical weight as described in Appendix 2. (*The fludarabine will be started approximately 1-2 hours after the cyclophosphamide and mesna on Days -7 and -6). To allow as much time between the last dose of fludarabine and the administration of the cell treatment, the timing of the fludarabine administration can be moved to an hour earlier each day.*)

**For patients randomized to TBI (Arm 2) the following will be added to the preparative regimen:**

#### Day -3 to Day -1:

Prior to TBI, patients will receive a single dose of IV ondansetron (ondansetron 0.15 mg/kg IV [*rounded to the nearest even mg dose between 8 mg and 16 mg based on patient weight*]) x 1 dose pre-TBI).

Patients will receive 2Gy of TBI twice a day for 3 days (total dose 12 Gy) using a linear accelerator in Radiation Oncology. Lungs will be shielded to a mean dose of 6 Gy.

#### Day-2 (Arm 2 only):

For infection prophylaxis, levofloxacin will be administered at a dose of 500mg PO once daily starting on day -2 and will continue daily as clinically indicated in the best clinical judgment of the attending physician.

### **3.3.2 Cell Infusion and Aldesleukin Administration**

#### Day 0 (one to three days after the last dose of agent in the preparative regimen):

Autologous young TIL infusion will be administered intravenously over 20 to 30 minutes (minimum 1 X 10<sup>9</sup> and up to a maximum of 2 X 10<sup>11</sup> lymphocytes).

Within 24 hours of cell infusion administration of aldesleukin will be initiated

#### Day 1-4 (Day 0 is the day of cell infusion):

- Aldesleukin 720,000 IU/kg IV (based on total body weight) over 15 minute approximately every eight hours (+/- 1 hour) for up to 5 days (maximum 15 doses).
- **For patients in cohort 2 only (TBI cohort):**

On day 1, the cryopreserved autologous CD34+ selected stem cell product will be thawed and administered intravenously immediately. The minimum dose will be  $> 2 \times 10^6$  CD34+ cells per kg.

o **For all patients:**

Beginning on day 1 or 2: Filgrastim will be started at 5 mcg/kg/day daily subcutaneously until neutrophil count  $> 1 \times 10^9/L$  X 3 days or  $> 5 \times 10^9/L$ . The maximum filgrastim dose will be 300 mcg per day.

**Table**

| Day                                              | -7 | -6 | -5 | -4 | -3 | -2 | -1 | 0 <sup>1</sup> | 1 | 2 | 3 | 4 |
|--------------------------------------------------|----|----|----|----|----|----|----|----------------|---|---|---|---|
| <b>Therapy</b>                                   |    |    |    |    |    |    |    |                |   |   |   |   |
| Cyclophosphamide<br>60 mg/kg                     | X  | X  |    |    |    |    |    |                |   |   |   |   |
| Fludarabine<br>25 mg/m <sup>2</sup>              | X  | X  | X  | X  | X  |    |    |                |   |   |   |   |
| TBI - 2Gy BID (cohort<br>2 only)                 |    |    |    |    | X  | X  | X  |                |   |   |   |   |
| Young TIL Cells                                  |    |    |    |    |    |    |    | X              |   |   |   |   |
| Aldesleukin                                      |    |    |    |    |    |    |    | X <sup>2</sup> | X | X | X | X |
| CD34+ Cells (Cohort 2<br>only)                   |    |    |    |    |    |    |    |                | X |   |   |   |
| Filgrastim <sup>3</sup><br>5 mcg/kg/day          |    |    |    |    |    |    |    |                | X | X | X | X |
| TMP/SMX <sup>4</sup><br>160mg/800mg<br>(example) | X  |    |    | X  |    |    |    | X              |   |   |   |   |
| Fluconazole <sup>5</sup><br>400 mg po            |    |    |    |    |    | X  | X  | X              | X | X | X | X |
| Valacyclovir po or<br>Acyclovir IV <sup>6</sup>  |    |    |    |    |    | X  | X  | X              | X | X | X | X |

<sup>1</sup>One to three days after the last dose of agent in the preparative regimen

<sup>2</sup>Initiate within approximately 24 hours after cell infusion

<sup>3</sup>Continue until neutrophils count  $> 1 \times 10^9/L$  X 3 days or  $> 5 \times 10^9/L$ .

<sup>4</sup>The TMP/SMX schedule should be adjusted to QD three times per week (Monday, Wednesday, Friday) and continue for at least six months and until CD4  $> 200$  X 2

<sup>5</sup>Continue until ANC  $> 1000/mm^3$

<sup>6</sup>In patients positive for HSV continue until CD4  $> 200$  X 2

### 3.4 **Total Body Irradiation (TBI)**

#### 3.4.1 **Energy**

All patients should be treated with a linear accelerator using energies higher than 4MV.

#### 3.4.2 **Timing**

It is anticipated that TBI will be delivered on day -3, -2, -1.

#### 3.4.3 **Technique**

TBI will be delivered with lateral fields using extended SSD/SAD values of 200-500cm (depending on machine/vault size) and partial transmission lung blocks. Patients will then receive AP/PA Mediastinal Boost fields using full blocks in the lung area.

#### 3.4.4 **Dose/Fractionation:**

Patients will be treated with TBI to a total dose of 1200 cGy delivered in 200 cGy fractions bid, at least 6 hours apart (six total treatments in three days). The mediastinal boost fields will be delivered at a dose of 100cGy per fraction for a total dose of 600cGy, also at least six hours apart.

### **3.4.5 Dose Modifications**

Occasionally, the total dose/technique of TBI may require modifications due to patient factors (unexpected or severe (grade 4-5) adverse events, serious medical illnesses not conducive to stable patient transfer, patient refusal, etc) or treatment factors (linear accelerator machine offline, etc.) Modifications to the radiation treatment will be at the discretion of the treating radiation oncologist and will be discussed with the Principal Investigator or Study Chairperson.

### **3.4.6 Toxicities:**

Toxicities associated with TBI include mucositis, infections, cataracts, pulmonary insufficiency, liver toxicity and secondary late malignancies. Treatment-related mortality in series receiving comparable doses are approximately 2 to 5%.

## **3.5 Infection Prophylaxis**

Note: Other anti infective agents may be substituted at the discretion of the treating investigator.

### **3.5.1 Pneumocystis Jirovecii Pneumonia**

All patients will receive the fixed combination of trimethoprim and sulfamethoxazole [SMX] as double strength (DS) tab (DS tabs = TMP 160 mg/tab, and SMX 800 mg/tab) P.O. daily three times a week on non-consecutive days, beginning on the first Monday, Wednesday, or Friday on or after the first dose of chemotherapy.

Pentamidine will be substituted for TMP/SMX-DS in patients with sulfa allergies. It will be administered aerosolized at 300 mg per nebulizer within one week prior to admission and continued monthly until CD4 count is above 200 and for at least 6 months post chemotherapy.

### **3.5.2 Herpes Virus Prophylaxis**

Patients with positive HSV serology will be given valacyclovir orally at a dose of 500 mg daily the day after chemotherapy ends, or acyclovir, 250 mg/m<sup>2</sup> IV q 12 hrs if the patient is not able to take medication by. Reversible renal insufficiency has been reported with IV but not oral acyclovir. Neurologic toxicity including delirium, tremors, coma, acute psychiatric disturbances, and abnormal EEGs have been reported with higher doses of acyclovir. Should this occur, a dosage adjustment will be made or the drug will be discontinued. Acyclovir will not be used concomitantly with other nucleoside analogs which interfere with DNA synthesis, e.g. ganciclovir. In renal disease, the dose is adjusted as per product labeling.

Prophylaxis for Pneumocystis and Herpes will continue for 6 months post chemotherapy. If the CD4 count is less than 200 at 6 months post chemotherapy, prophylaxis will continue until the CD4 count is greater than 200 X 2.

### **3.5.3 Fungal Prophylaxis (Fluconazole)**

Patients will start Fluconazole 400 mg p.o. the day after chemotherapy concludes and continue until the absolute neutrophil count is greater than 1000/mm<sup>3</sup>. The drug may be given IV at a dose of 400 mg in 0.9% sodium chloride USP daily in patients unable to take it orally.

### **3.5.4 Infection Prophylaxis for Patients in Cohort 2 (TBI cohort)**

Patients who receive the 1200 TBI regimen are myeloablated and consequently more susceptible to infection. Therefore, patients in cohort 2 only will receive levofloxacin as follows: 500mg PO once daily starting on day -2. Dosing will continue daily as clinically indicated in the best clinical judgment of the attending physician.

### **3.5.5 Empiric Antibiotics**



Patients will start on broad-spectrum antibiotics, either a 3<sup>rd</sup> or 4<sup>th</sup> generation cephalosporin or a quinolone for fever of 38.3°C once or two temperatures of 38.0°C or above at least one hour apart, AND an ANC <500/mm<sup>3</sup>. Aminoglycosides should be avoided unless clear evidence of sepsis. Infectious disease consultation will be obtained for all patients with unexplained fever or any infectious complications.

### **3.6 Blood Product Support**

Using daily CBC's as a guide, the patient will receive platelets and packed red blood cells (PRBC's) as needed. Attempts will be made to keep Hb >8.0 gm/dl, and plts >20,000/mm<sup>3</sup>. All blood products with the exception of the stem cell product will be irradiated. Leukocyte filters will be utilized for all blood and platelet transfusions to decrease sensitization to transfused WBC's and decrease the risk of CMV infection.

### **3.7 Aldesleukin: Intravenous Administration**

Aldesleukin will be administered at a dose of 720,000 IU/kg (based on total body weight) as an intravenous bolus over a 15 minute period every eight hours eight hours (+/- 1 hour) beginning on the day of cell infusion and continuing for up to 5 days (maximum 15 doses). Doses will be skipped if patients reach Grade 3 or 4 toxicity due to aldesleukin except for the reversible Grade 3 toxicities common to aldesleukin such as diarrhea, nausea, vomiting, hypotension, skin changes, anorexia, mucositis, dysphagia, or constitutional symptoms and laboratory changes as detailed in Appendix 3. Toxicities will be managed as outlined in Appendix 4. If these toxicities can be easily reversed within 24 hours by supportive measures then additional doses may be given. If greater than 2 doses of aldesleukin are skipped, aldesleukin administration will be stopped. In addition, dosing may be held or stopped at the discretion of the treating investigator.

Because confusion is a possible side effect of aldesleukin administration, a Durable Power of Attorney will be signed by the patient to identify a surrogate to make decisions if a patient becomes unable to make decisions.

### **3.8 On Study Evaluation**

#### **3.8.1 Prior to starting the preparative regimen**

- Apheresis as indicated
- Within 21 days prior to starting the preparative regimen, patients will have a complete blood count, electrolytes, BUN, creatinine, liver function tests and serum chemistries performed. If any results are beyond the criteria established for eligibility, the patient will not proceed until the abnormalities can be resolved.

#### **3.8.2 During the preparative regimen (daily):**

- Complete Blood Count
- Chem 20: [Sodium (Na), Potassium (K), Chloride (Cl), Total CO<sub>2</sub> (bicarbonate), Creatinine, Glucose, Urea nitrogen (BUN), Albumin, Calcium total, Magnesium total (Mg), Inorganic Phosphorus, Alkaline Phosphatase, ALT/GPT, AST/GOT, Total Bilirubin, Direct Bilirubin, LD, Total Protein, Total CK, Uric Acid]
- Urinalysis
- CMV antigen assay will be assessed if clinically indicated (e.g. unexplained fevers, pulmonary changes).
- Review of systems and physical exam at least 3 times/week
- Vital signs as per routine

### **3.8.3 After Cell Infusion**

Vital signs will be monitored hourly (+/- 15 minutes) for four hours and then routinely (every 4 - 6 hours) unless otherwise clinically indicated

### **3.8.4 During and after Aldesleukin administration until hospital discharge**

#### **Every 1-2 days**

- Complete Blood Count
- Chem 20: [Sodium (Na), Potassium (K), Chloride (Cl), Total CO<sub>2</sub> (bicarbonate), Creatinine, Glucose, Urea nitrogen (BUN), Albumin, Calcium total, Magnesium total (Mg), Inorganic Phosphorus, Alkaline Phosphatase, ALT/GPT, AST/GOT, Total Bilirubin, Direct Bilirubin, LD, Total Protein, Total CK, Uric Acid].
- Review of systems and physical exam at least 3 times/week
- Vital signs as per routine
- 

### **3.8.5 Severe Immune reactions**

Cytokine levels may be assayed on patients who experience rapidly escalating grade 3 or 4 events assessed as being likely related to the cell product. If the cytokine levels are greatly elevated, and the patient is decompensating, aggressive supportive measures will be instituted as appropriate until cytokine levels are on a significant downward trend.

## **3.9 Additional Research Evaluations**

- The amount of blood that may be drawn from adult patients for research purposes shall not exceed 10.5 mL/kg or 550 mL, whichever is smaller, over any eight week period.
- Once total lymphocyte count is greater than 200/mm<sup>3</sup>, the following samples will be drawn and sent to the TIL lab on Monday, Wednesday and Friday x 5 and then weekly
  - 5 CPT tubes (8 ml each)
  - 1 SST tube (8 ml)
  - 1 SST tube (4ml) daily starting on the day of chemotherapy
- To determine predictors of renal toxicity and possible biodosimeters of radiation dose, the following samples will be collected, and then delivered to Dr. Deborah Citrin, M.D., Radiation Oncology Branch, NCI
- For patients in **Arm 2** (receiving TBI)
  - Prior to the first dose of radiation (Day -3):
    - 3 tubes of blood consisting of 1 red top tube (4 mls), 1 purple top tube (6 mls), and 1 CPT tube (10 mls)
    - Urine specimen collected in blue cup (20-30 mls)
  - Prior to the second dose of radiation (Day -3, 6 hrs after the 1<sup>st</sup> radiation dose)
    - 3 tubes of blood consisting of 1 red top tube (4 mls), 1 purple top tube (6 mls), and 1 CPT tube (10 mls)
  - Prior to the last dose of radiation on day -1
    - Urine specimen collected in blue cup (20-30 mls)
  - If renal toxicity occurs:
    - 1 tube of blood consisting of 1 purple top tube (6 mls),
    - Urine specimen collected in blue cup (20-30 mls)
  - Six months (± 1 month) following the last dose of treatment
    - 1 tube of blood consisting of 1 purple red tube (4 mls),
    - Urine specimen collected in blue cup (20-30 mls)

- For patients in **Arm 1** (not receiving TBI)
  - On Day -3
    - 3 tubes of blood consisting of 1 red top tube (4 mls), 1 purple top tube (6 mls), and 1 CPT tube (10 mls)
    - Urine specimen collected in blue cup (20-30 mls)
  - If renal toxicity occurs:
    - 1 tube of blood consisting of 1 purple top tube (6 mls),
    - Urine specimen collected in blue cup (20-30 mls)
  - Six months ( $\pm$  1 month) following the last dose of treatment
    - 1 tube of blood consisting of 1 purple top tube (6 mls),
    - Urine specimen collected in blue cup (20-30 mls)
- With approval of amendment C, to analyze metabolites of vitamin A in the serum, the following samples may be collected from patients treated on both arms of this study and sent to the Dept. of Nutritional Science and Toxicology, University of California at Berkley. One tube of blood (1 ml) may be collected in a 2.5 ml red top tube at the following times:
  - On day -8
  - Between day +10 and day +14
  - At follow-up visits

Please note, due to the light and temperature sensitive nature of vitamin A metabolites, **all samples must be collected in the presence of Dr. Christopher Klebanoff. Please page (pager # 11195) Dr. Klebanoff to coordinate sample collection at the times indicated above.**

In addition, to assess dendritic cell subsets, 4 tubes of blood (10 ml) may be collected in CPT tubes at the following times:

- On day -8
- Between day +10 and day +14
- At follow-up visits

These samples will be processed by Dr. Christopher Klebanoff.

- 10 cc serum and separated lymphocytes from blood will be obtained prior to cell infusion and following each infusion if possible and cryopreserved for subsequent testing;
- Leukapheresis will be utilized to obtain peripheral blood lymphocytes in patients, pretreatment and may be repeated at approximately 4-6 weeks after the cell infusions and will consist of a 7.5-liter exchange to last approximately three hours. All patients undergoing pheresis will sign informed consent.
- Biopsies of tumor tissue or lymph node may be performed but are not required during the course of therapy. Studies may evaluate the antigen expression by the tumor and to evaluate the reactivity of lymphocytes grown from these biopsies. Biopsies will be performed at baseline, after the course of therapy, and in the event of response. These biopsies will only be performed if minimal morbidity is expected based on the procedure performed and the granulocyte and platelet count. Biopsies will only be allowed if the biopsy does not require more than 1 day in the hospital.
- Peripheral blood lymphocytes (PBL) will be purified by centrifugation on a Ficoll cushion, then evaluated for function and phenotype. Lymphocytes may be tested by cytolysis assays, cytokine release, limiting dilution analysis and by other experimental studies. Immunological monitoring will consist of quantifying T cells reactive with HLA-matched tumor cells using established techniques such as intracellular FACS, cytokine release assays, and Elispot assays. Immunological assays will be standardized by the inclusion of 1) pre-infusion PBMC and 2) an

aliquot of the T cells cryopreserved at the time of infusion. TCR gene usage may be quantitated in samples using conventional sequencing techniques of the T cell receptor variable regimen of the beta chain.

- A variety of tests including evaluation of specific lysis and cytokine release, intracellular FACS of cytokine production, ELISA-spot assays, and lymphocyte subset analysis may be used to evaluate the immunological correlates of treatment. In general, differences of 2 to 3 fold in these assays are indicative of true biologic differences.
- Samples of all infused cell products will be cryopreserved, and extensive retrospective analysis of infused cell phenotype and function will be performed to attempt to find in vitro characteristics of the infused cells which correlate with in vivo antitumor activity. Analyses of TIL samples will include evaluation of the activity, specificity, and telomere length of the infused TIL.

### **3.10 Post Treatment Evaluation:**

**3.10.1** The initial post treatment evaluation will be conducted approximately 6 weeks (+/- 2 weeks) following administration of the cell product

**3.10.2** Patients who experience stable disease, a partial response, or a complete response or have unresolved toxicities will be evaluated as noted below:

- Week 12 (+/- 2 weeks)
- Every 3 months (+/- 1 month) x3
- Every 6 months (+/- 1 month) x 5 years
- As per PI discretion for subsequent years

**Note:** Patients may be seen more frequently as clinically indicated

**3.10.3** At each scheduled evaluation patients will undergo:

- Physical examination
- Chem 20 equivalent: Sodium (Na), Potassium (K), Chloride (Cl), Total CO<sub>2</sub> (bicarbonate), Creatinine, Glucose, Urea nitrogen (BUN), Albumin, Calcium total, Magnesium total (Mg), Inorganic Phosphorus, Alkaline Phosphatase, ALT/GPT, AST/GOT, Total Bilirubin, Direct Bilirubin, LD, Total Protein, Total CK, Uric Acid
- Complete blood count
- Thyroid panel as clinically indicated
- Toxicity assessment, including a review of systems.
- CT of the chest, abdomen and pelvis as clinically indicated. If clinically indicated, other scans or x-rays may be performed, e.g. brain MRI, bone scan.
- Visual symptoms will be evaluated and if changes have occurred from baseline, i.e. changes in visual acuity, an ophthalmologic consult will be performed.
- A 5 liter apheresis may be performed at the first follow up visit, if the patient is unable to undergo pheresis, approximately 96 ml of blood may be obtained. Subsequently, approximately 60 ml of blood will be obtained at follow up visits for at least 3 months. Peripheral blood mononuclear cells will be cryopreserved so that immunologic testing may be performed.
- Patients who develop renal failure will undergo a nephrology consultation and a renal biopsy, if indicated.

**3.10.4** Patients who develop progressive disease or are unable or unwilling to return for follow up evaluations will be followed via phone or e-mail contact. The following information may be requested from the patient:

- Summary of treatment received, including adverse events, since the previous contact
- Estimation of performance status
- Request for imaging studies, physical exam and laboratory reports to be sent to the PI

**3.10.5** **.Off Treatment Criteria**

Patients will be taken off treatment (and followed for survival) for the following:

- Completion of treatment
- Grade 3 or greater autoimmunity that involves vital organs (heart, kidneys, brain, eye, liver, colon, adrenal gland, lungs).
- If a patient experiences grade 3 or 4 toxicity due to cell infusion as referred to under section 7.2.4 occurring within 24 hours post cell infusion that does not reverse to grade 2 or less within 8 hours with 2 doses of 650 mg po of acetaminophen or two dose of 50 mg po of diphenhydramine the patient will receive no further cells but may continue to receive IL-2.
- Grade 2 or greater allergic reaction including bronchospasm or generalized urticaria
- Grade 3 or greater toxicity due to cytokines (as referred to under Appendix 4) that does not decrease to grade 2 or less within 96 hours of management according to study site SOP.
- Patients with progressive disease who elect not to undergo further active treatment.
- If the PI determines that continued treatment is not in the best interest of the patient.

**3.10.6** **Off Study Criteria**

Patients will be taken off study for the following:

- The patient voluntarily withdraws
- There is significant noncompliance
- General or specific changes in the patient's condition render continued participation the patient unacceptable for further follow up in the judgment of the investigator.
- Death

**Note:** patients who are taken off study for progressive disease or study closure may be followed on Protocol 09-C-0161 - "Follow up Protocol for Subjects Previously Enrolled in NCI Surgery Branch Studies."

Patients must be followed until all adverse events have resolved to grade 2 or less with the exception of lymphopenia and alopecia. If an adverse event is not expected to resolve to grade 2 or less this will be noted in the patient medical record and the patient may be taken off study.

**4** **Supportive Care**

Patients will have blood transfusions in order to maintain a minimum hemoglobin of greater than 8.0 g/dL. Concomitant medications to control side effects of therapy will be given. Meperidine (25-50 mg) will be given intravenously if severe chills develops. Other supportive therapy will be given as required and may include acetaminophen (650 mg q4h), indomethacin (50-75 mg q6h) and ranitidine (150 mg q12h). Patients who require transfusions will receive irradiated blood products. Additional antiemetic therapy will be administered for breakthrough nausea and vomiting. Patients will receive supportive care as indicated for aldesleukin toxicities as listed in Appendix 4.

## 5 Data Collection and Evaluation

### 5.1 Response Criteria

Clinical response will be determined using RECIST version 1.0

#### 5.1.1 Evaluation of target lesions<sup>1</sup>

- Complete Response (CR): Disappearance of all target lesions
- Partial Response (PR): At least a 30% decrease in the sum of the longest diameter (LD) of target lesions taking as reference the baseline sum LD.
- Progression (PD): At least a 20% increase in the sum of LD of target lesions taking as reference the smallest sum LD recorded since the treatment started or the appearance of one or more new lesions.
- Stable Disease (SD): Neither sufficient shrinkage to qualify for PR nor sufficient increase to qualify for PD taking as references the smallest sum LD.

#### 5.1.2 Evaluation of non-target lesions<sup>2</sup>

- Complete Response (CR): Disappearance of all non-target lesions and normalization of tumor marker level.
- Non-Complete Response: Persistence of one or more non-target lesions
- Progression (PD): Appearance of one or more new lesions. Unequivocal progression of existing non-target lesions

#### 5.1.3 Evaluation of best overall response

The best overall response is the best response recorded from the start of treatment until disease progression/recurrence (taking as reference for progressive disease the smallest measurements recorded since the treatment started). The patient's best response assignment will depend on the achievement of both measurement and confirmation criteria. The time to progression will be measured from the date of randomization.

| <b>Target Lesions</b> | <b>Non-Target Lesions</b> | <b>New Lesions</b> | <b>Overall Response</b> |
|-----------------------|---------------------------|--------------------|-------------------------|
| CR                    | CR                        | No                 | CR                      |
| CR                    | Non-CR/Non-PD             | No                 | PR                      |
| PR                    | Non-PD                    | No                 | PR                      |
| SD                    | Non-PD                    | No                 | SD                      |
| PD                    | Any                       | Yes or No          | PD                      |
| Any                   | PD                        | Yes or No          | PD                      |
| Any                   | Any                       | Yes                | PD                      |

#### 5.1.4 Confirmatory Measurement/Duration of Response Confirmation

- 
- 1 All measurable lesions up to a maximum of 10 lesions representative of all involved organs should be identified as **target lesions** and recorded and measured at baseline. Target lesions should be selected on the basis of their size (lesions with the longest diameter) and their suitability for accurate repetitive measurements (either by imaging techniques or clinically). A sum of the longest diameter (LD) for all target lesions will be calculated and reported as the baseline sum LD. The baseline sum LD will be used as reference to further characterize the objective tumor response of the measurable dimension of the disease.
  - 2 All other lesions (or sites of disease) should be identified as **non-target lesions** and should also be recorded at baseline. Measurements are not required, and these lesions should be followed as "present" or "absent."

To be assigned a status of PR or CR, changes in tumor measurements must be confirmed by repeat studies that should be performed at least 4 weeks after the criteria for response are first met. In the case of SD, follow-up measurements must have met the SD criteria at least once after study entry at a minimum interval of 6-8 weeks.

#### **Duration of Overall Response**

The duration of overall response is measured from the time measurement criteria are met for CR/PR (whichever is first recorded) until the first date that recurrent or progressive disease is objectively documented (taking as reference for progressive disease the smallest measurements recorded since the treatment started).

The duration of overall complete response is measured from the time measurement criteria are first met for CR until the first date that recurrent disease is objectively documented.

#### **Duration of Stable Disease**

Stable disease is measured from the start of the treatment until the criteria for progression are met, taking as reference the smallest measurements recorded since the treatment started.

### **5.1.5 Image Acquisition Plan**

Images will be obtained digitally and reviewed by a radiologist in a blinded fashion for the determination of tumor response.

## **5.2 Toxicity Criteria**

Careful evaluation to ascertain the toxicity, immunologic effects and anti-tumor efficacy of the treatment regimens will be performed. This study will utilize the CTCAE version 3.0 for toxicity and adverse event reporting. A copy of the CTCAE version 3.0 can be downloaded from the website <http://ctep.cancer.gov>. All appropriate treatment areas should have access to a copy of the CTCAE version 3.0.

Over 100 patients have been treated in the Surgery Branch, NCI with TIL. Early toxicities related specifically to the infusion of the cells (those which are seen immediately following cell infusion and prior to aldesleukin administration) are generally mild and include fevers, chills, headache, and malaise. Toxicities which occur following administration of aldesleukin but are thought to be related to the cells include immune mediated events such as vitiligo, transient uveitis, hearing loss and vestibular dysfunction. The use of the non-myeloablative regimen prior to cell administration increases the toxicity of this treatment as profound myelosuppression occurs in all patients. In 93 patients treated with TIL using the non-myeloablative chemotherapy regimen with or without total body irradiation, there was one treatment related death (NMA + 200 cGy TBI) due to an unexpected but preexisting diverticular abscess.

The standard approach to the administration of high-dose aldesleukin in all studies is to continue dosing until grade 3 or 4 events occur. The most commonly seen grade 4 events are pulmonary and renal impairment, and mental status changes. These toxicities may sometimes require intubation for protection of the patient's airway. It is important to note that although these patients require significant supportive measures during this period, all toxicities are reversible and the overwhelming majority of patients have suffered no long term sequelae following this treatment regimen. However, fatal complications are possible and it is therefore only appropriate to carry out this experimental treatment in the context of life threatening metastatic cancer.

To ensure safety using this treatment, the NCI SB will review safety data on all protocols semi-annually at the time of continuing review. Data will be presented for both the recent 6 month period and for the entire length of time the protocol has been open. The

toxicity data for review will include all toxicities captured on the protocol and will be presented in individual tables as follows:

- all toxicities attributed to the cells,
- all incidences of intubation including the duration of and reason for intubation,
- all grade 2 unexpected adverse events, and all grade 3 or greater events regardless of attribution.

Toxicities seen on protocols using this non-myeloablative regimen and aldesleukin, that occur during the follow up period are rare but have included EBV lymphoma following prolonged lymphopenia, herpes zoster infection, and sensory neuropathy likely related to fludarabine.

The major discomforts of the research are those of nausea and vomiting, mucositis, anorexia, diarrhea, fever and malaise. Side effects of common drugs used in this regimen include:

- Cyclophosphamide: Marrow suppression, nausea, mucositis, rash, hemorrhagic cystitis, myocardial damage, alopecia, infertility, nausea and vomiting, SIADH.
- Fludarabine: Myelosuppression, fever and chills, nausea and vomiting, malaise, fatigue, anorexia, weakness, neurologic toxicity, and interstitial pneumonitis. Serious opportunistic infections have occurred in CLL patients treated with fludarabine.
- Antimicrobials in general: Allergic reactions, renal impairment, nausea, vomiting, hepatic damage, marrow suppression, photosensitivity.
- TBI: Mucositis, infections, cataracts, pulmonary insufficiency, liver toxicity, thrombotic microangiopathy, and secondary late malignancies.
- High-dose aldesleukin administration: A listing of these side effects in 652 patients who received 1,039 treatment courses are listed in Appendix 3. SAEs will be reported as per Section 7.0, Data Reporting.

### **5.3 Statistical Section**

The primary objectives of the trial are to compare in a prospective randomized study both the complete response rate and the overall survival of patients with metastatic melanoma receiving ACT using young TIL plus aldesleukin treatment following either a chemotherapy preparative regimen alone, or the same chemotherapy preparative regimen plus TBI.

The secondary objectives are to determine clinical response rate and progression free survival in patients in the two treatment arms, and to determine the toxicity of these two treatment regimens.

In a series of consecutive trials using this chemotherapy preparative regimen alone or with 2 Gy or 12 Gy total body irradiation (TBI) objective response rates using RECIST criteria were 49%, 52%, and 72%, respectively. Complete regression rates in these three consecutive trials were 12%, 20%, and 40%, respectively— suggesting that the addition of TBI could be associated with a greater complete regression rate. Of the 20 complete regressions seen in this trial, 19 are on-going at 37 to 82 months.

A total of 112 evaluable patients (56 per arm) will be randomized to ACT following a chemo preparative regimen + 12 Gy TBI vs. ACT following a chemo preparative regimen alone. The patients will be stratified for M1a vs. M1b+M1c disease.

By enrolling 112 patients, the trial will have the following statistical characteristics.



As there are two primary endpoints, the study will have sufficient patients for each of the two main outcomes to be evaluated using a 0.025 alpha level two-tailed test in order to conservatively adjust for the effect of two endpoints while maintaining an overall 0.05 alpha level test. In practice, a Hochberg adjustment to the p-values may be performed, which is less overly stringent than the Bonferroni correction using 0.025 for each test.

With 56 patients per arm, there will be 80% power to detect a difference between an 8% complete response rate and a 33% complete response rate using a two-tailed Fisher's exact test at the 0.025 significance level. These rates were selected since each represents a modest decline from that identified using a more standard TIL regimen.

With respect to overall survival, it will be assumed that the arm without TBI will be associated with an 8 month median survival, since the overall survival using standard TIL without TBI was approximately 12 months based on 43 patients. This arm would have an associated hazard rate of 0.0866, or approximately a 9% death rate per month. The arm including TBI will be estimated to have a 16 month median survival time, based on the median survival of approximately 24 months using standard TIL. This arm would have an associated hazard rate of 0.0433, or approximately 4% death rate per month. Assuming a 36-month accrual period and an additional 24 months of follow-up to evaluate survival after the last patient has been enrolled, 56 patients per arm will have 88% power to detect this hazard ratio of 2.00 using a 0.025 two-tailed log rank test. The primary analysis with respect to this endpoint will thus be determined with Kaplan-Meier curves and a log-rank test.

Analysis will be done on an intent-to-treat basis; patients will be included in the primary analysis according to the arm on which they have been randomly assigned, whether they are able to receive the intended therapy or not.

Progression free survival will be estimated with a Kaplan-Meier curve and results between the curves compared with a log-rank test, as a secondary endpoint. The rates of clinical response (PR+CR) will also be estimated and compared as a secondary endpoint, with a two-tailed Fisher's exact test. Finally, toxicities will also be compared using a Cochran-Armitage test for those types of toxicities which are experienced by greater than 5 patients on each arm.

Although accrual is expected to be fairly rapid, and approximately 40 or more patients per year are expected to enroll on the trial, the study will be monitored by the NCI/CCR Data Safety and Monitoring Board on an annual basis to evaluate the toxicity on the two arms and be sure that the toxicity on the TBI arm is not appreciably worse than what is observed on the other arm. In addition, at the first DSMB meeting held following the point at which approximately one half of the required total subjects have been enrolled (56 total evaluable patients) and potentially followed for 6 months, a single evaluation for futility and for better than expected efficacy will be undertaken. Note that this may mean that approximately 75-80 patients may have been enrolled by the time that 56 have been potentially followed for 6 months.

The futility evaluation will be performed as follows: based on the overall survival percentage of the first 56 patients randomized and potentially followed for 6 months, a conditional power analysis will be performed to determine if the trial is unlikely to find an effect at the 0.025 two-tailed significance level with continued accrual. Using 40% and 60% as the projected probability values for 12 months overall survival for the patients who will be accrued on the two arms under the alternative, and using the actual observed proportions alive at 12 months from among those patients who are randomized and potentially followed for 6 months, the conditional power of the trial will be

determined assuming accrual of the remaining patients to achieve a total of 112 patients. If the conditional probability of finding a difference at the 0.025 two-sided level at the conclusion of the trial is less than 10%, then it will be reasonable to recommend that no further patients will be enrolled.

The evaluation for better than expected efficacy will be performed as follows: an O'Brien-Fleming interim evaluation boundary will be used. If the p-value at the interim point (based on approximately 56 total patients enrolled and followed for 6 months) is  $<0.0054$ , then the trial will stop accrual for better than expected efficacy. By using this interim evaluation, the final significance level should be  $<0.0246$  instead of 0.025 to declare the result to be significant at the 0.05 level.

It is expected that 40 to 50 patients per year can be accrued onto this trial. Allowing for a very small number of inevaluable patients, the accrual ceiling will be set at 118 patients. Thus, it is anticipated that the trial can complete its accrual in approximately 3 years.

#### **5.4 Data and Safety Monitoring Plan**

Careful evaluation to ascertain the toxicity, immunologic effects and anti-tumor efficacy of cell infusions will be performed. Patients experiencing thrombotic microangiopathy will be managed in close collaboration with our nephrology consultants. The principal investigator will review all SAEs and will monitor the data and toxicities to identify trends monthly. The principal investigator will be responsible for revising the protocol as needed to maintain safety. The NCI IRB will review submitted adverse events monthly to also evaluate trends and will require a follow-up plan from the principal investigator whenever a trend is identified. This study will be monitored by the NCI/CCR Data Safety and Monitoring Board as described above in Section 5.3.

#### **5.5 Clinical Trial Monitoring Plan**

A detailed description of the clinical trial monitoring plan has been included in the initial IND submission as required.

This trial will be monitored by personnel employed by Harris Technical Services on contract to the NCI, NIH. Monitors are qualified by training and experience to monitor the progress of clinical trials. Personnel monitoring this study will not be affiliated in any way with the trial conduct.

At least 25% of enrolled patients' will be randomly selected and monitored at least quarterly, base on accrual rate. The patients selected will have 100% source document verification done. Additional monitoring activities will include: adherence to protocol specified study eligibility, treatment plans, data collection for safety and efficacy, reporting and time frames of adverse events to the NCI IRB and FDA, and informed consent requirements. Written reports will be generated in response to the monitoring activities and submitted to the Principal investigator and Clinical Director or Deputy Clinical Director, CCR, NCI.

#### **5.6 Handling of Tissue Specimens for Research Purposes**

Blood and tissue collected during the course of this study will follow the Cell Tracking and Labeling System established by the Tumor Immunology Cell Processing Laboratory. The Cell Tracking and Labeling System is designed to unambiguously ensure that patient/data verification is consistent. The patients' cell samples (blood or tissue) are

tracked by distinct identification labels that include a unique patient identifier and date of specimen collection. Cryopreserved blood and tissue samples also bear the date the sample was frozen. All cryopreserved samples are tracked for freezer location and storage criteria. All samples are stored in monitored freezers/refrigerators in 3NW Surgery Branch Laboratories at specified temperatures with alarm systems in place. Serum samples will be sent to the Clinical Pharmacology Program (CPP) for storage. Samples will be barcoded and stored on site or offsite at NCI Frederick Central Repository Services (Fisher Bioservices) in Frederick, MD. Data is entered and stored securely in the Patient Sample Data Management System (PSDMS) utilized by the CPP, and data will be updated to the Surgery Branch central computer database weekly. All samples (blood or tissue) are entered into a central computer database with identification and storage location, and this database is backed up every night.

At the conclusion of this protocol, if additional studies are to be performed on any samples obtained during the conduct of this trial, a Request to Conduct Research for Stored Human Samples Specimens, or Data Collected in a Terminated NCI-IRB Protocol will be submitted. Otherwise, specimens will be disposed of in accordance with the environmental protection laws, regulations and guidelines of the Federal Government and the State of Maryland. Any loss or unintentional destruction of the samples will be reported to the IRB.

#### **5.7 Collaborator Studies:**

With Amendment C, the NCI Surgery Branch will enter into an agreement with colleague Joseph L. Napoli, Ph.D., Professor and Chairman of Nutritional Science and Toxicology, University of California at Berkeley to analyze metabolites of vitamin A, including all trans retinoic acid, retinyl ester, and retinol in serum samples from patients treated on both arms of this study. We are interested in analyzing metabolites of vitamin A since using a mouse model that closely mimics our current adoptive T cell protocols in patients, we found that host conditioning (irradiation) caused an acute vitamin A-deficient state and a loss of a vitamin A-responsive dendritic cell subset. Moreover, we found that in this setting, replacement of the vitamin A-derivative (called ATRA) back to the animals profoundly enhanced the efficacy of the treatment and restored this dendritic cell subset. Our objective is to attempt to document whether a similar loss of vitamin A occurs in patients receiving either NMA conditioning or TBI. De-identified specimens will be analyzed and the results will be sent to the NCI Surgery Branch. The NCI Surgery Branch will release coded serum samples collected in association with this protocol to Dr. Joseph L. Napoli for analysis of these samples as specified in NCI Material Transfer Agreement # 33284-11. Specimens will be labeled with the study identifier only and will be shipped to the address below on dry ice.

Dr. Sunny Wang, Napoli Lab.  
Dept. of Nutritional Science and Toxicology  
150 Morgan Hall, MC # 3104  
UC Berkeley  
Berkeley, CA 94720-3104

Telephones numbers: Dr. Napoli = 510-642-5202; lab = 510-643-0640

Fax number: 510-642-0535.

#### **6 Human Subjects Protections**

### **6.1 Rationale for Patient Selection**

The patients to be entered in this protocol have metastatic melanoma which is refractory to standard therapy, and limited life expectancies.

Subjects from both genders and all racial/ethnic groups are eligible for this study if they meet the eligibility criteria. To date, there is no information that suggests that differences in drug metabolism or disease response would be expected in one group compared to another. Efforts will be made to extend accrual to a representative population, but in this preliminary study, a balance must be struck between patient safety considerations and limitations on the number of individuals exposed to potentially toxic and/or ineffective treatments on the one hand and the need to explore gender and ethnic aspects of clinical research on the other hand. If differences in outcome that correlate to gender or to ethnic identity are noted, accrual may be expanded or a follow-up study may be written to investigate those differences more fully.

### **6.2 Participation of Children**

The use of the nonmyeloablative and myeloablative regimen in this protocol is a major procedure which entails serious discomforts and hazards for the patient, such that fatal complications are possible. It is therefore only appropriate to carry out this experimental procedure in the context of life threatening metastatic cancer. Since the efficacy of this experimental procedure is unknown, it does not seem reasonable to expose children to this risk without further evidence of benefit. Should results of this study indicate efficacy in treating metastatic cancer, which is not responsive to other standard forms of therapy, future research can be conducted in the pediatric population to evaluate potential benefit in that patient population.

### **6.3 Evaluation of Benefits and Risks**

The experimental treatment has a chance to provide clinical benefit though this is unknown. The NCI Surgery Branch has extensive experience with ACT following treatment with high dose aldesleukin, however this experimental treatment is only available at a very few centers throughout the country. Although we have seen responses to this treatment, we do not know whether adding total body irradiation to the lymphodepleting chemotherapy regimen will result in a higher complete response rate or longer survival. The risks associated with ACT are substantial, including, a delay in treatment due to the need to harvest and grow the cells, a surgical procedure (possible major) to obtain tumor for the cell product, the possibility that a cell product cannot be generated, infection and sepsis due to non-myeloablative chemotherapy, intubation, and renal toxicities due to aldesleukin, and death. Side effect associated with TBI include mucositis, infections, cataracts, pulmonary insufficiency, liver toxicity and secondary late malignancies.

The risks in this treatment are further detailed in section 5.2. The goal is to compare survival and complete response rate in patients receiving adoptive cell therapy and aldesleukin with or without TBI. The success of this effort cannot be predicted at this time. Because all patients in this protocol have melanoma cancer and limited life expectancies the potential benefit of both arms is thought to outweigh the potential risks.

### **6.4 Consent Document**

If the patient meets the thorough screening for eligibility, the patient, with family members or friends at the request of the patient, will be presented with a detailed description of the protocol treatment. The specific requirements, objectives, and potential advantages and disadvantages will be presented. The Informed Consent document is given to the patient, who is requested to review it and to ask questions prior to agreeing to participate in the treatment

portion of this protocol. The patient is reassured that participation on trial is entirely voluntary and that he/she can withdraw or decide against treatment at any time without adverse consequences. The research nurse, principal investigator, associate investigator, or clinical associate is responsible for obtaining written consent from the patient.

## **7 Data Reporting**

Data will be submitted to the FDA, and NCI IRB, according to the applicable guidelines and regulations. This study will utilize the CTCAE 3.0 for toxicity and Adverse Event reporting. A copy of the CTCAE 3.0 can be downloaded from the CTEP home page (<http://ctep.cancer.gov>). All appropriate treatment areas should have access to a copy of the CTCAE 3.0.

This study will be monitored by the Internal Monitoring System conducted by Harris Technical Services Corporation, with reporting to the QA specialist of the CCR, NCI.

### **7.1 Definitions**

#### **7.1.1 Adverse Event**

An adverse event is defined as any reaction, side effect, or untoward event that occurs during the course of the clinical trial associated with the use of a drug in humans, whether or not the event is considered related to the treatment or clinically significant. For this study, AEs will include events reported by the patient, as well as clinically significant abnormal findings on physical examination or laboratory evaluation. A new illness, symptom, sign or clinically significant laboratory abnormality or worsening of a pre-existing condition or abnormality is considered an AE.

All AEs, including clinically significant abnormal findings on laboratory evaluations, regardless of severity, will be followed until satisfactory resolution. AEs should be reported up to 30 days following the last dose of study drug. AEs that are considered treatment related, expected, continuing, but not resolvable by 30 days after treatment completion (e.g., alopecia) will not be followed after the 30-day period.

#### **7.1.2 Suspected adverse reaction**

Suspected adverse reaction means any adverse event for which there is a reasonable possibility that the drug caused the adverse event. For the purposes of IND safety reporting, 'reasonable possibility' means there is evidence to suggest a causal relationship between the drug and the adverse event. A suspected adverse reaction implies a lesser degree of certainty about causality than adverse reaction, which means any adverse event caused by a drug.

#### **7.1.3 Unexpected adverse reaction**

An adverse event or suspected adverse reaction is considered "unexpected" if it is not listed in the investigator brochure or is not listed at the specificity or severity that has been observed; or, if an investigator brochure is not required or available, is not consistent with the risk information described in the general investigational plan or elsewhere in the current application.

"Unexpected", also refers to adverse events or suspected adverse reactions that are mentioned in the investigator brochure as occurring with a class of drugs or as anticipated from the pharmacological properties of the drug, but are not specifically mentioned as occurring with the particular drug under investigation.

#### **7.1.4 Serious**

An adverse event or suspected adverse reaction is considered serious if in the view of the investigator or the sponsor, it results in any of the following:

- Death,
- A life-threatening adverse drug experience
- Inpatient hospitalization or prolongation of existing hospitalization
- A persistent or significant disability/incapacity
- A congenital anomaly/birth defect.
- Important medical events that may not result in death, be life-threatening, or require hospitalization may be considered a serious adverse drug experience when, based upon appropriate medical judgment, they may jeopardize the patient or subject and may require medical or surgical intervention to prevent one of the outcomes listed in this definition.

#### **7.1.5 Disability**

A substantial disruption of a person's ability to conduct normal life functions.

#### **7.1.6 Life-threatening adverse drug experience**

Any adverse event or suspected adverse reaction that places the patient or subject, in the view of the investigator or sponsor, at immediate risk of death from the reaction as it occurred, i.e., it does not include a reaction that had it occurred in a more severe form, might have caused death.

#### **7.1.7 Protocol Deviation (NIH Definition)**

Any change, divergence, or departure from the study procedures in a research protocol that **does not** have a major impact on the subject's rights, safety or well-being, or the completeness, accuracy and reliability of the study data.

#### **7.1.8 Protocol Violation (NIH Definition)**

Any change, divergence, or departure from the IRB-approved study procedures in a research protocol that **does** have a major impact on the subject's rights, safety, or well-being and/or the completeness, accuracy and reliability of the study data.

#### **7.1.9 Unanticipated Problem**

Any incident, experience, or outcome that:

- Is unexpected in terms of nature, severity, or frequency in relation to
    - (a) the research risks that are described in the IRB-approved research protocol and informed consent document; Investigator's Brochure or other study documents, and
    - (b) the characteristics of the subject population being studied; AND
  - Is related or possibly related to participation in the research; AND
- Places subjects or others at a greater risk of harm (including physical, psychological, economic, or social harm) than was previously known or recognized.

### **7.2 NCI-IRB Reporting**

#### **7.2.1 NCI-IRB Expedited Reporting of Adverse Events, Unanticipated Problems, and Deaths**

The Protocol PI will report to the NCI-IRB:

- All unexpected serious adverse events that are possibly, probably, or definitely related to the research
- All deaths, except deaths due to progressive disease
- All Protocol Violations or Deviations
- All Unanticipated Problems

Reports must be received by the NCI-IRB within 7 working days of PI awareness via iRIS.

### **7.2.2 NCI-IRB Requirements for PI Reporting of Adverse Events at Continuing Review**

The protocol PI will report to the NCI-IRB:

1. All Grade 2 **unexpected** events that are possibly, probably or definitely related to the research;
2. All Grade 3 and 4 events that are possibly, probably or definitely related to the research;
3. All Grade 5 events regardless of attribution;
4. All Serious Events regardless of attribution.

**NOTE:** Grade 1 events are not required to be reported.

### **7.2.3 NCI-IRB Reporting of IND Safety Reports**

Only IND Safety Reports that require a sponsor recommended change to the protocol or the consent form or in the opinion of the PI increases risks to study participants will need to be reported to the NCI IRB.

### **7.3 Routine Data Reporting:**

All information surrounding patient screening, diagnosis, tumor harvest, treatment, and follow up will be recorded in the patient medical record. Data will be reported via the NCI C3D reporting system.

### **7.4 Routine Adverse Event Reporting**

Following registration through 30 days after the last treatment, adverse events will be recorded in the source documents, reviewed by the designated data manager or research nurse or principle investigator, and will be captured in C3D. All events occurring during the treatment phase of the study will be followed until resolution to grade 2 or baseline. During the follow up period, only grade 3 and 4 and unexpected grade 2 events that are related the treatment will be captured in C3D.

#### **7.4.1 Exclusions to Routine Adverse Event Reporting:**

Patients will be receiving multiple agents which include commercially available agents (fludarabine, cyclophosphamide, aldesleukin, and supportive medications) in combination with the investigational agents. Therefore, all grade 1 and all expected grade 2 adverse events do not require reporting/recording.

## 7.4.2 Reporting of laboratory events

Laboratory results will be uploaded in C3D however only those events (including grade 3 and 4 events) that support the diagnosis of a reportable adverse event or that reflect major organ function will be considered adverse events. For example grade 3 and 4, creatinine, liver function tests, hemoglobin, ANC, ALC, platelets, and lipase and amylase as indicated will be captured as adverse events; electrolytes, BUN, albumin, total protein, uric acid etc, and the remainder of the CBC differential will not be captured as adverse events. For hematological toxicities, the event will not be considered resolved until it reaches grade 2 without the support of transfusions or growth factors.

## 7.4.3 Reporting of non-laboratory events

For reportable expected adverse events: the adverse event start date will be the date the event reaches a grade 3; the event will be considered resolved once it reaches grade 2. The highest grade the event reaches in that period will be considered the grade of the event. For unexpected adverse events, the adverse event start date will be the date the event reaches a grade 2; the event will be considered resolved once it reaches grade 1 or baseline. The highest grade the event reaches in that period will be considered the grade of the event.

## 7.5 Serious Adverse Event Reporting to the FDA:

During the duration of this trial, the principal investigator will assume responsibility for reporting any serious and unexpected adverse events to the U.S. Food and Drug Administration (FDA) with appropriate deadlines defined by the regulations.

FDA will be informed by phone or fax of any unexpected fatal or life threatening suspected adverse reaction as soon as possible but in no event, later than 7 calendar days after the sponsor's initial receipt of the information.

FDA will be informed of any other unexpected and serious adverse event, by written notification within 15 calendar days after the sponsor's initial receipt of the information.

All adverse events, including serious adverse events, will be reported in the annual report to the FDA as indicated in 21CFR312.33.

## 8 Pharmaceutical Information

### 8.1 Aldesleukin (Interleukin-2, Proleukin, Recombinant Human Interleukin 2)

How Supplied: Aldesleukin (Interleukin-2) is manufactured by the Novartis Pharmaceuticals Corporation, Florham Park, NJ and will be purchased by the NIH Clinical Pharmacy Department from commercial sources.

Formulation/Reconstitution: Aldesleukin is provided as single-use vials containing 22 million IU (-1.3 mg) IL-2 as a sterile, white to off-white lyophilized cake plus 50 mg mannitol and 0.18 mg sodium dodecyl sulfate, buffered with approximately 0.17 mg monobasic and 0.89 mg dibasic sodium phosphate to a pH of 7.5 (range 7.2 to 7.8). The vial is reconstituted with 1.2 mL of Sterile Water for Injection, USP, and the resultant concentration is 18 million IU/ml or 1.1 mg/mL. Diluent should be directed against the side of the vial to avoid excess foaming. Swirl contents gently until completely dissolved. Do not shake. Since vials contain no preservative, reconstituted solution should be used within 24 hours.



Storage: Intact vials are stored in the refrigerator (2° - 8°C) protected from light. Each vial bears an expiration date.

Dilution/Stability: Reconstituted aldesleukin should be further diluted with 50 mL of 5% Human Serum Albumin (HSA). The HSA should be added to the diluent prior to the addition of RIL-2. Dilutions of the reconstituted solution over a 1000-fold range (i.e., 1 mg/mL to 1 mcg/mL) are acceptable in either glass bottles or polyvinyl chloride bags. Aldesleukin is chemically stable for 48 hours at refrigerated and room temperatures, 2° – 30°C.

Administration: The dosage will be calculated based on total body weight. The final dilution of aldesleukin will be infused over 15 minutes. Aldesleukin will be administered as an inpatient.

Toxicities: Expected toxicities of aldesleukin are listed in the product label and in Appendix 3 and 4. Grade 3 toxicities common to aldesleukin include diarrhea, nausea, vomiting, hypotension, skin changes, anorexia, mucositis, dysphagia, or constitutional symptoms and laboratory changes as detailed in Appendix 3. Additional grade 3 and 4 toxicities seen with aldesleukin are detailed in Appendix 4.

## **8.2 Fludarabine**

Description: (Please refer to package insert for complete product information)

Fludarabine phosphate is a synthetic purine nucleoside that differs from physiologic nucleosides in that the sugar moiety is arabinose instead of ribose or deoxyribose. Fludarabine is a purine antagonist antimetabolite.

How Supplied: It will be purchased by the NIH Clinical Pharmacy Department from commercial sources. Fludarabine is supplied in a 50 mg vial as a fludarabine phosphate powder in the form of a white, lyophilized solid cake.

Stability: Following reconstitution with 2 mL of sterile water for injection to a concentration of 25 mg/ml, the solution has a pH of 7.7. The fludarabine powder is stable for at least 18 months at 2-8°C; when reconstituted, fludarabine is stable for at least 16 days at room temperature. Because no preservative is present, reconstituted fludarabine will typically be administered within 8 hours. Specialized references should be consulted for specific compatibility information. Fludarabine is dephosphorylated in serum, transported intracellularly and converted to the nucleotide fludarabine triphosphate; this 2-fluoro-ara-ATP molecule is thought to be required for the drug's cytotoxic effects. Fludarabine inhibits DNA polymerase, ribonucleotide reductase, DNA primase, and may interfere with chain elongation, and RNA and protein synthesis.

Storage: Intact vials should be stored refrigerated (2-8°C).

Administration: Fludarabine is administered as an IV infusion in 100 ml 0.9% sodium chloride, USP over 15 to 30 minutes. The doses will be based on body surface area (BSA). If patient is obese (BMI > 35) drug dosage will be calculated using practical weight as described in Appendix 2.

Toxicities: At doses of 25 mg/m<sup>2</sup>/day for 5 days, the primary side effect is myelosuppression; however, thrombocytopenia is responsible for most cases of severe and life-threatening hematologic toxicity. Serious opportunistic infections have occurred in CLL patients treated with fludarabine. Hemolytic anemia has been reported after one or more courses of fludarabine with or without a prior history of a positive Coomb's test; fatal hemolytic anemia has been reported. In addition, bone marrow fibrosis has been observed after fludarabine therapy. Other common adverse effects include malaise, fever, chills, fatigue, anorexia, nausea and vomiting, and weakness. Irreversible and potentially fatal central nervous system toxicity in the form of progressive encephalopathy, blindness, and coma is only rarely observed at the currently administered doses of fludarabine. More common neurologic side effects at the current doses of

fludarabine include weakness, pain, malaise, fatigue, paresthesia, visual or hearing disturbances, and sleep disorders. Adverse respiratory effects of fludarabine include cough, dyspnea, allergic or idiopathic interstitial pneumonitis. Tumor lysis syndrome has been rarely observed in fludarabine treatment of CLL. Treatment on previous adoptive cell therapy protocols in the Surgery Branch have caused persistently low (below 200) CD4 counts, and one patient developed polyneuropathy manifested by vision blindness, and motor and sensory defects.

### **8.3 Cyclophosphamide**

#### **(Refer to FDA-approved package insert for complete product information)**

**Description:** Cyclophosphamide is a nitrogen mustard-derivative alkylating agent. Following conversion to active metabolites in the liver, cyclophosphamide functions as an alkylating agent; the drug also possesses potent immunosuppressive activity. The serum half-life after IV administration ranges from 3-12 hours; the drug and/or its metabolites can be detected in the serum for up to 72 hours after administration.

**How Supplied:** Cyclophosphamide will be obtained from commercially available sources by the Clinical Center Pharmacy Department.

**Stability:** Following reconstitution as directed with sterile water for injection, cyclophosphamide is stable for 24 hours at room temperature or 6 days when kept at 2-8°C.

**Administration:** It will be diluted in 250 ml D5W and infused over one hour. The dose will be based on the patient's body weight. If patient is obese (BMI > 35) drug dosage will be calculated using practical weight as described in Appendix 2.

**Toxicities:** Hematologic toxicity occurring with cyclophosphamide usually includes leukopenia and thrombocytopenia. Anorexia, nausea and vomiting, rash and alopecia occur, especially after high-dose cyclophosphamide; diarrhea, hemorrhagic colitis, infertility, and mucosal and oral ulceration have been reported. Sterile hemorrhagic cystitis occurs in about 20% of patients; severity can range from microscopic hematuria to extensive cystitis with bladder fibrosis. Although the incidence of hemorrhagic cystitis associated with cyclophosphamide appears to be lower than that associated with ifosfamide, mesna (sodium 2-mercaptoethanesulfonate) has been used prophylactically as a uroprotective agent in patients receiving cyclophosphamide. Prophylactic mesna is not effective in preventing hemorrhagic cystitis in all patients. Patients who receive high dose cyclophosphamide may develop interstitial pulmonary fibrosis, which can be fatal. Hyperuricemia due to rapid cellular destruction may occur, particularly in patients with hematologic malignancy. Hyperuricemia may be minimized by adequate hydration, alkalization of the urine, and/or administration of allopurinol. If allopurinol is administered, patients should be watched closely for cyclophosphamide toxicity (due to allopurinol induction of hepatic microsomal enzymes). At high doses, cyclophosphamide can result in a syndrome of inappropriate antidiuretic hormone secretion; hyponatremia with progressive weight gain without edema occurs. At high doses, cyclophosphamide can result in cardiotoxicity. Deaths have occurred from diffuse hemorrhagic myocardial necrosis and from a syndrome of acute myopericarditis; in such cases, congestive heart failure may occur within a few days of the first dose. Other consequences of cyclophosphamide cardiotoxicity include arrhythmias, potentially irreversible cardiomyopathy, and pericarditis. Other reported adverse effects of cyclophosphamide include headache, dizziness, and myxedema; faintness, facial flushing, and diaphoresis have occurred following IV administration. Mesna (sodium 2-mercaptoethanesulfonate; given by IV injection) is a synthetic sulfhydryl compound that can chemically interact with urotoxic metabolites of cyclophosphamide (acrolein and 4-hydroxycyclophosphamide) to decrease the incidence and severity of hemorrhagic cystitis.

#### **8.4 Mesna (Sodium 2-mercaptoethanesulfonate, Mesnum, Mesnex, NSC-113891)**

(Please refer to the FDA-approved package insert for complete product information)

Description: Mesna will be obtained commercially by the Clinical Center Pharmacy Department and is supplied as a 100 mg/ml solution.

Storage: Intact ampoules are stored at room temperature.

Stability: Diluted solutions (1 to 20 mg/mL) are physically and chemically stable for at least 24 hours under refrigeration. Mesna is chemically stable at room temperature for 48-72 hours in D5W, 48-72 hour in D5W/0.45% NaCl, or 24 hours in 0.9% NaCl.

Administration: Dilute to concentrations less than or equal to 20 mg mesna/ml fluid in D5W or 0.9% NaCl and to be administered intravenously as a continuous infusion. If patient is obese (BMI > 35) drug dosage will be calculated using practical weight as described in Appendix 2. Toxicities include nausea, vomiting and diarrhea.

#### **8.5 Filgrastim (Granulocyte Colony-Stimulating Factor, G-CSF, Filgrastim, Neupogen)**

Filgrastim will be obtained commercially by the Clinical Center Pharmacy Department and is supplied in 300 ug/ml and 480 ug/1.6 ml vials. Filgrastim should be refrigerated and not allowed to freeze. The product bears the expiration date. The product should not be shaken. It is generally stable for at least 10 months when refrigerated. The appropriate dose is drawn up into a syringe. Filgrastim will be given as a daily subcutaneous injection. The side effects of filgrastim are skin rash, myalgia and bone pain, an increase of preexisting inflammatory conditions, enlarged spleen with occasional associated low platelet counts, alopecia (with prolonged use) elevated blood chemistry levels.

#### **8.6 Trimethoprim and Sulfamethoxazole Double Strength (TMP / SMX DS)**

TMP/SMX DS will be obtained by the Clinical Center Pharmacy Department from commercial sources. It will be used for the prevention of PCP pneumonia. The oral dose is 1 tablet PO daily three times a week (on NON-consecutive days) beginning on the first Monday, Wednesday, or Friday on or after the first dose of chemotherapy and continuing for at least 6 months and until the CD4 count is greater than 200 on 2 consecutive lab studies. Like other sulfa drugs, TMP/SMX DS can cause allergies, fever, photosensitivity, nausea, and vomiting. Allergies typically develop as a widespread itchy red rash with fever eight to fourteen days after beginning the standard dose. Neutropenia, a reduction in the number of neutrophils, can also occur.

##### **8.6.1 Aerosolized Pentamidine in Place of TMP/SMX DS:**

Patients with sulfa allergies will receive aerosolized Pentamidine 300 mg per nebulizer within one week prior to admission and continued monthly until the CD4 count is above 200 on two consecutive follow up lab studies and for at least 6 months post chemotherapy. Pentamidine Isethionate will be obtained by the Clinical Center Pharmacy Department from commercial sources. It will be used to prevent the occurrence of PCP infections. It is supplied in 300 mg vials of lyophilized powder and will be administered via nebulizer. Toxicities reported with the use of Pentamidine include metallic taste, coughing, bronchospasm in heavy smokers and asthmatics; increased incidence of spontaneous pneumothorax in patients with previous PCP infection or pneumatoceles, or hypoglycemia.

#### **8.7 Herpes Virus Prophylaxis**

##### **8.7.1 Valacyclovir (Valtrex)**

Valacyclovir will be obtained by the Clinical Center Pharmacy Department from commercial sources. It will be used orally to prevent the occurrence of herpes virus

infections in patients with positive HSV serology. It is supplied in 500 mg tablets. Valacyclovir will be started the day after the last dose of fludarabine at a dose of 500 mg orally daily if the patient is able to tolerate oral intake. See package insert for dosing adjustments in patients with renal impairment. Common side effects include headache, upset stomach, nausea, vomiting, diarrhea or constipation. Rare serious side effects include hemolytic uremic syndrome and thrombotic thrombocytopenic purpura.

#### **8.7.2 Acyclovir**

Acyclovir will be obtained by the Clinical Center Pharmacy Department from commercial sources. It will be used to prevent the occurrence of herpes virus infections in patients who cannot take oral medications. It is supplied as powder for injection in 500 mg/vials. Reconstitute in 10 mL of sterile water for injection to a concentration of 50 mg/mL. Reconstituted solutions should be used within 12 hours. IV solutions should be diluted to a concentration of 7mg/mL or less and infused over 1 hour to avoid renal damage. Reversible renal insufficiency has been reported with IV but not oral acyclovir. Neurologic toxicity including delirium, tremors, coma, acute psychiatric disturbances, and abnormal EEGs have been reported with higher doses of acyclovir. Should this occur, a dosage adjustment will be made or the drug will be discontinued. Stomach upset, headache or nausea, rash or hives; peripheral edema; pain, elevated liver function tests; and leukopenia, diarrhea, lymphadenopathy, myalgias, visual abnormalities and elevated creatinine have been reported. Hair loss from prolonged use has been reported. Acyclovir will not be used concomitantly with other nucleoside analogs which interfere with DNA synthesis, e.g. gancyclovir. In renal disease, the dose is adjusted as per product labeling.

#### **8.8 Fluconazole**

Fluconazole will be obtained by the Clinical Center Pharmacy Department from commercial sources. It will be used to prophylax against fungal infections. It is available in 200 mg tablets. It can cause headache, nausea, vomiting, diarrhea or abdominal pain, and liver damage which may be irreversible. It can cause rashes and itching, which in rare cases has caused Stevens Johnson Syndrome. It has several significant drug interactions. The package insert should be consulted prior to prescribing. For IV administration in patients who cannot tolerate the oral preparation, Fluconazole comes in 2 MG/ML solution for injection, and prepared according to Clinical Center Pharmacy standard procedures. It should be administered at a maximum IV rate of 200 mg/hr.

#### **8.9 Cell Preparation**

The procedure for growing and expanding the autologous young CD8+ TIL and the Certificate of Analysis are similar to those approved by the Food and Drug Administration and used at the NCI in protocol 07-C-0176. This product will be provided for investigational use only under a sponsor-investigator IND. The Certificate of Analysis is in Appendix 1 and the Standard Operating Procedures for the growth of TIL and the purification of CD8+ cells are included in the IND.

#### **8.10 OKT3**

OKT3 will be obtained by the Surgery Branch Laboratory from commercial sources. Formulation: Muromonab-CD3 (Ortho), NSC #618843, is provided as a sterile, clear, colorless solution at a concentration of 1 mg/ml in 5 ml ampoules. The solution may contain a few fine, translucent protein particles. The antibody is dissolved in a buffered solution at pH of 6.5 to 7.5. The solution contains 2.25 mg of monobasic sodium

phosphate, 9 mg of dibasic sodium phosphate, 43 mg of sodium chloride and 1 mg of polysorbate 80 per 5 ml of water for injection.

Storage/Stability: Ampules should be stored in a refrigerator at 2-8°C. Solution should not be frozen or shaken. Each ampule bears an expiration date.

### **8.11 Support Medications**

#### Ondansetron hydrochloride

Ondansetron hydrochloride will be obtained by the Clinical Center Pharmacy Department from commercial sources. It will be used to control nausea and vomiting during the chemotherapy preparative regimen. It can cause headache, dizziness, myalgias, drowsiness, malaise, and weakness. Less common side effects include chest pain, hypotension, pruritis, constipation and urinary retention. Consult the package insert for specific dosing instructions.

#### Furosemide

Furosemide will be obtained by the Clinical Center Pharmacy Department from commercial sources. It will be used to enhance urine output during the chemotherapy preparative regimen with cyclophosphamide. Adverse effects include dizziness, vertigo, paresthesias, weakness, orthostatic hypotension, photosensitivity, rash and pruritis. Consult the package insert for a complete list of all side effects.

## 9 Figures, Tables & Appendices

**Table 1. Characteristics of patients enrolled on lymphodepleting adoptive cell therapy protocols**

| TOTAL         | Patients      | NMA   |        | TBI-200 |        | TBI-1200 |        | TOTAL |        |
|---------------|---------------|-------|--------|---------|--------|----------|--------|-------|--------|
|               |               | 43    | (100%) | 25      | (100%) | 25       | (100%) | 93    | (100%) |
| Sex           | Male          | 26    | (60%)  | 17      | (68%)  | 18       | (72%)  | 61    | (66%)  |
|               | Female        | 17    | (40%)  | 8       | (32%)  | 7        | (28%)  | 32    | (34%)  |
| Age           | 11 - 20       | 2     | (5%)   | 0       | (0%)   | 1        | (4%)   | 3     | (3%)   |
|               | 21 - 30       | 3     | (7%)   | 3       | (12%)  | 2        | (8%)   | 8     | (9%)   |
|               | 31 - 40       | 8     | (19%)  | 5       | (20%)  | 6        | (24%)  | 19    | (20%)  |
|               | 41 - 50       | 16    | (37%)  | 9       | (36%)  | 4        | (16%)  | 29    | (31%)  |
|               | 51 - 60       | 12    | (28%)  | 8       | (32%)  | 12       | (48%)  | 32    | (34%)  |
|               | 61 - 70       | 2     | (5%)   | 0       | (0%)   | 0        | (0%)   | 2     | (2%)   |
| ECOG          | 0             | 33    | (77%)  | 20      | (80%)  | 19       | (76%)  | 72    | (77%)  |
|               | 1             | 10    | (23%)  | 5       | (20%)  | 6        | (24%)  | 21    | (23%)  |
| Prior Rx      | None          | 0     | (0%)   | 0       | (0%)   | 0        | (0%)   | 0     | (0%)   |
|               | Surgery       | 43    | (100%) | 25      | (100%) | 25       | (100%) | 93    | (100%) |
|               | Chemotherapy  | 22    | (51%)  | 7       | (28%)  | 5        | (20%)  | 34    | (37%)  |
|               | Radiotherapy  | 15    | (35%)  | 6       | (24%)  | 2        | (8%)   | 23    | (25%)  |
|               | Hormonal      | 1     | (2%)   | 0       | (0%)   | 1        | (4%)   | 2     | (2%)   |
|               | Immunotherapy | 42    | (98%)  | 24      | (96%)  | 21       | (84%)  | 87    | (94%)  |
|               | Any 2 or more | 43    | (100%) | 25      | (100%) | 22       | (88%)  | 90    | (97%)  |
| Any 3 or more | 27            | (63%) | 9      | (36%)   | 6      | (24%)    | 42     | (45%) |        |

**Table 2:** Transfusions and grade 3 and 4 non-hematologic toxicities associated with NMA plus TBI lymphodepleting preparative regimens.

|                                                 | 200cGy TBI          | 1200cGy TBI         |
|-------------------------------------------------|---------------------|---------------------|
| <b>Total patients</b>                           | <b>25</b>           | <b>25</b>           |
| <u>Transfusions administered (+SD)</u>          |                     |                     |
| Platelets (6-10 units per transfusion)          | 3.8 ( <u>±</u> 3.4) | 8.1 ( <u>±</u> 4.4) |
| Packed RBCs                                     | 4.0 ( <u>±</u> 3.7) | 6.2 ( <u>±</u> 4.0) |
| <u>Infection related toxicities</u>             |                     |                     |
| CMV infection                                   | 1                   | 1                   |
| Herpes zoster                                   | 1                   | 2                   |
| Positive blood cultures                         | 2                   | 4                   |
| <u>Other toxicities</u>                         |                     |                     |
| Intubated for somnolence                        | 1                   | 4                   |
| Pulmonary hypertension                          | 1                   | 0                   |
| Febrile neutropenia                             | 12                  | 16                  |
| Jugular venous thrombosis                       | 1                   | 0                   |
| Autoimmune uveitis and hearing loss (transient) | 0                   | 1                   |
| Thrombotic microangiopathy                      | 0                   | 4*                  |
| Death (bowel-perforation sepsis)                | 1                   | 0                   |

**\*Two of these patients have had biopsy evidence of microangiopathy and have stable renal function and are ongoing complete responders at 49+ months and 46+ months and are living normally. Two other patients were suspected to have this diagnosis. One is an ongoing complete responder at 52+ months and one had a partial response lasting 13 months but died of progressive metastatic melanoma.**



**Table 3:** Time in Hospital and Non-hematological Grade 3 and 4 Toxicities Related to Lymphodepleting Chemotherapy and Cell Transfer

| Attribute measured            | Duration, Number or Type | Number of Patients (%) |
|-------------------------------|--------------------------|------------------------|
| Days in Hospital <sup>1</sup> | 6-10                     | 6 (17%)                |
|                               | 11-15                    | 18 (51%)               |
|                               | 16-20                    | 4 (11%)                |
|                               | 21-25                    | 7 (20%)                |
| pRBC Transfusions             | 0                        | 2 (6%)                 |
|                               | 1-5                      | 18 (51%)               |
|                               | 6-10                     | 13 (37%)               |
|                               | 11-15                    | 2(6%)                  |
| Platelet Transfusions         | 0                        | 6 (17%)                |
|                               | 1-5                      | 21 (60%)               |
|                               | 6-10                     | 5 (14%)                |
|                               | 11-15                    | 2 (6%)                 |
|                               | 16-20                    | 1 (3%)                 |
| Autoimmunity                  | Uveitis                  | 5 (14%)                |
|                               | Vitiligo                 | 13 (37%)               |
| Opportunistic Infections      | Herpes zoster            | 3 (9%)                 |
|                               | Pneumocystis pneumonia   | 2 (6%)                 |
|                               | EBV-B cell lymphoma      | 1 (3%)                 |
|                               | RSV pneumonia            | 1 (3%)                 |
| Other                         | Febrile neutropenia      | 13 (37%)               |
|                               | Intubated for dyspnea    | 3 (9%)                 |
|                               | Cortical blindness       | 1 (3%)                 |

<sup>1</sup>Measured from the day of cell administration to discharge

**Table 4: Objective response rates in 3 ACT studies.**

| <b>Cell Transfer Therapy</b> |              |                                         |     |     | <b>(8/1/10)</b> |                 |                 |
|------------------------------|--------------|-----------------------------------------|-----|-----|-----------------|-----------------|-----------------|
| <b>Treatment</b>             | <b>Total</b> | <b>PR</b>                               |     |     |                 | <b>CR</b>       | <b>OR (%)</b>   |
|                              |              | number of patients (duration in months) |     |     |                 |                 |                 |
| <b>No TBI</b>                | <b>43</b>    | <b>16</b>                               |     |     |                 | <b>5</b>        | <b>21 (49%)</b> |
|                              |              | (84,                                    | 36, | 29, | 28,             | (82+, 81+, 79+, |                 |
|                              |              | 14,                                     | 12, | 11, | 7,              | 78+, 64+)       |                 |
|                              |              | 7,                                      | 7,  | 7,  | 4,              |                 |                 |
|                              |              | 4,                                      | 2,  | 2,  | 2)              |                 |                 |
| <b>200 TBI</b>               | <b>25</b>    | <b>8</b>                                |     |     |                 | <b>5</b>        | <b>13 (52%)</b> |
|                              |              | (14,                                    | 9,  | 6,  | 6,              | (68+, 64+, 60+, |                 |
|                              |              | 5,                                      | 4,  | 3,  | 3)              | 57+, 54+)       |                 |
| <b>1200TBI</b>               | <b>25</b>    | <b>8</b>                                |     |     |                 | <b>10</b>       | <b>18(72%)</b>  |
|                              |              | (21,                                    | 13, | 7,  | 6,              | (48+, 45+, 44+, |                 |
|                              |              | 6,                                      | 5,  | 3,  | 2)              | 44+, 39+, 38+,  |                 |
|                              |              |                                         |     |     |                 | 38+, 38+, 37+,  |                 |
|                              |              |                                         |     |     |                 | 19)             |                 |

(52 responding patients: 42 had prior IL-2; 22 had prior IL-2 + chemotherapy)  
 (20 complete responses: 19 ongoing at 37 to 82 months)

Table 5:

## Objective Responses in Patients with Metastatic Melanoma

---

|                            | Total | CR                     | PR        | OR        |
|----------------------------|-------|------------------------|-----------|-----------|
|                            |       | number of patients (%) |           |           |
| Dacarbazine <sup>1</sup>   | 149   | 4(2.7%)                | 14(9.4%)  | 18(12.1%) |
| Interleukin-2 <sup>2</sup> | 270   | 17(6.3%)               | 26(9.6%)  | 43(17.9%) |
| Ipilimumab <sup>3</sup>    | 540   | 3(0.6%)                | 35(6.4%)  | 38(7.0%)  |
| PLX 4032 <sup>4</sup>      | 48    | 3(6.3%)                | 34(70.8%) | 37(77.1%) |
| Cell Transfer <sup>5</sup> | 93    | 20(21.5%)              | 32(34.4%) | 52(55.9%) |

1) Middleton et al JCO, 18:158, 2000

2) Atkins et al JCO, 17:2105, 1999

3) Hodi et al NEJM, 363:711, 2010

4) Flaherty et al NEJM, 363:809, 2010

5) Dudley et al JCO, 26:5233, 2008 (updated 2010)

Figure 1:

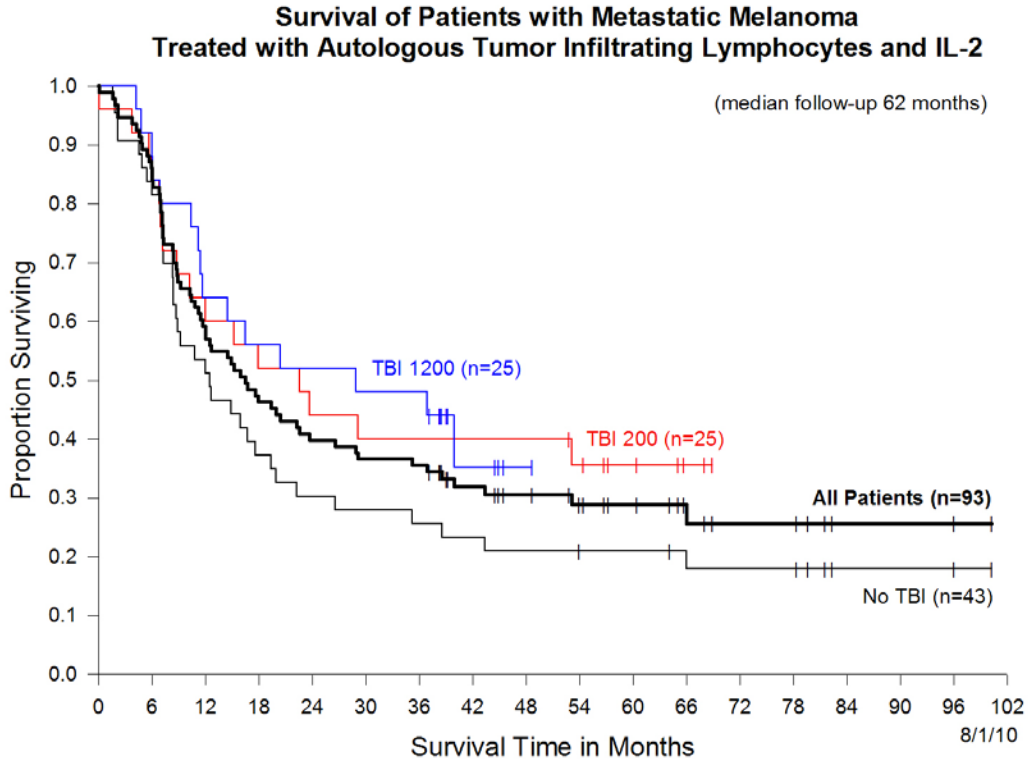

Table 2:

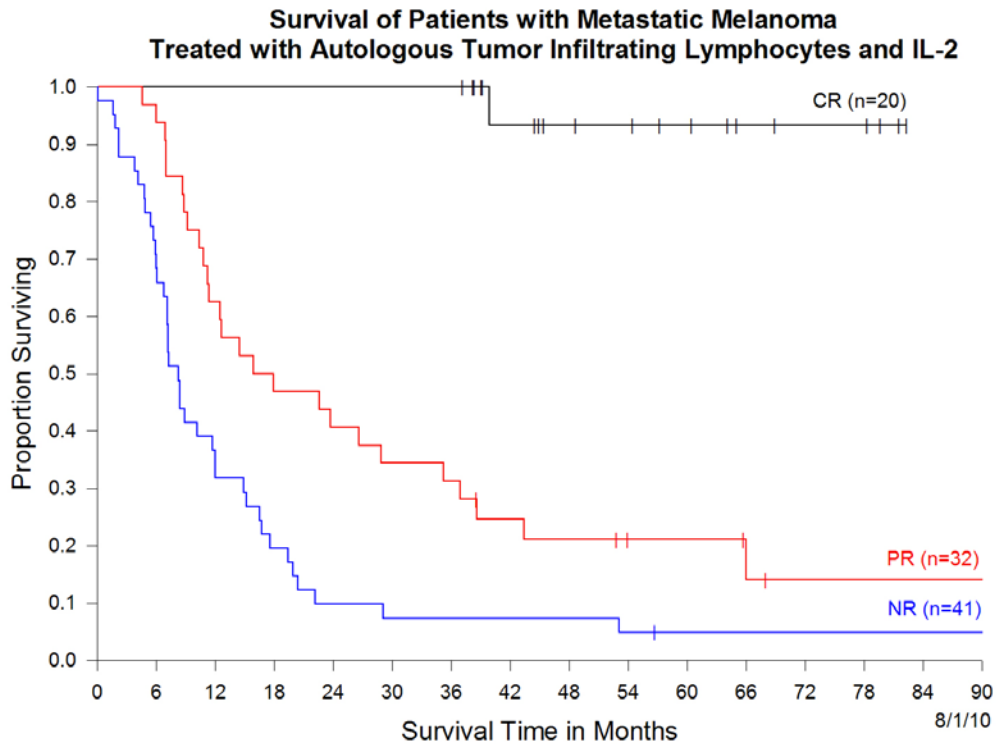

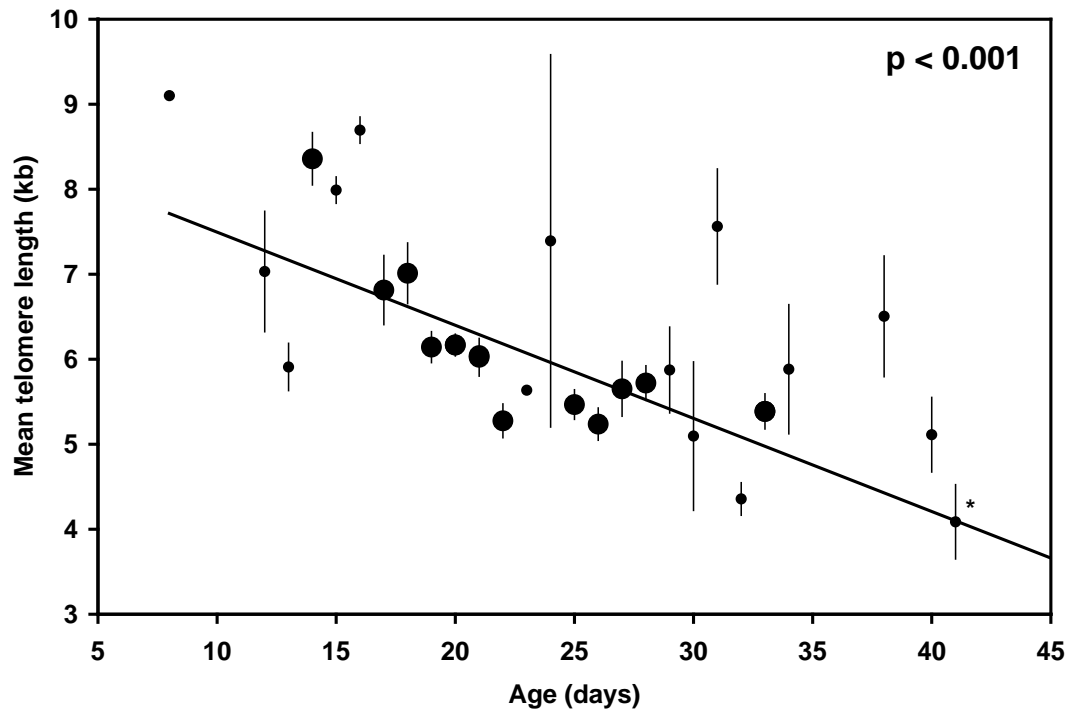

**Figure 3.** Telomere length decreases over time as TIL are maintained in culture. Telomere lengths of 495 TIL from 48 consecutive patients were evaluated by quantitative fluorescent in-situ hybridization. Mean telomere lengths calculated from 10 or more independent samples are indicated by large data points and from less than 10 samples are indicated by small data points. Error bars indicate standard errors. The trend line was calculated from all 495 individual data points. \*Cells are from TIL 41 to 56 days old.

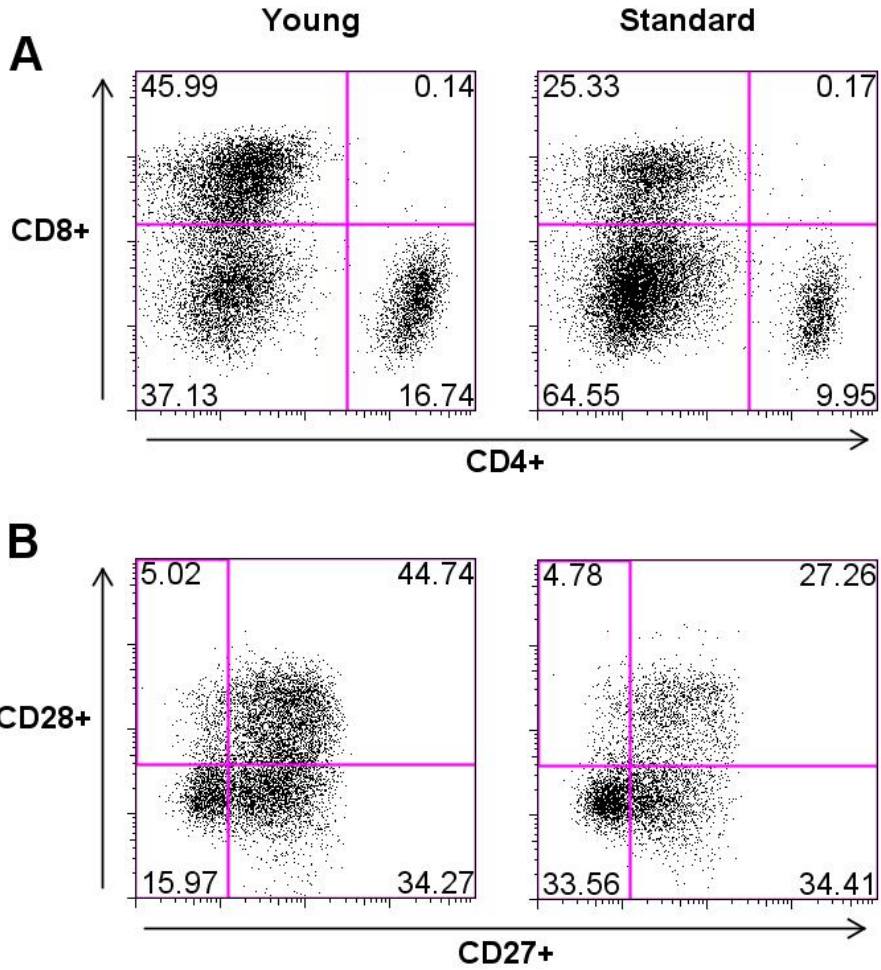

**Figure 4:** Expression of CD4, CD8, CD 27, and CD 28 of TIL generated from one tumor specimen. Young TIL were 15 days old and standard TIL were 29 days old. Plots of CD27 and CD 28 expressions are gated for CD8+ lymphocytes.

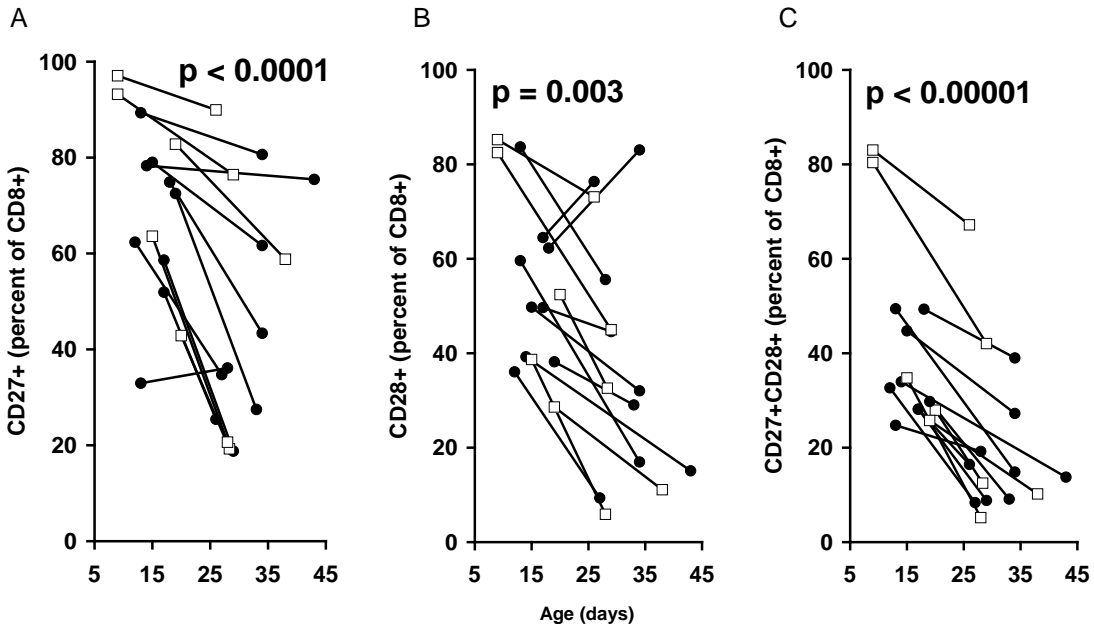

**Figure 5.** The phenotype of CD8+ lymphocytes changes over time as TIL are maintained in culture. Filled circles represent TIL generated from enzymatic digests of tumor and open square represent TIL from tumor fragments. CD8+ lymphocytes in young TIL (mean age of 15 days) express significantly more CD27 and CD28 than standard TIL (mean age of 31 days).



Appendix 1

**Certificate of Analysis:**

**Young TIL**

Patient:

Date of preparation of final product:

Unique TIL identifier (tumor and culture number):

Allogeneic PBMC

Donor Name(s):

Pheresis date:

Tests performed on final product:

| <i>Test</i>                           | <i>Method</i>                    | <i>Limits</i>                                                 | <i>Result</i> | <i>Initials/Date</i> |
|---------------------------------------|----------------------------------|---------------------------------------------------------------|---------------|----------------------|
| Cell viability <sup>1</sup>           | trypan blue exclusion            | >70%                                                          |               |                      |
| Total viable cell number <sup>1</sup> | visual microscopic count         | between 10 <sup>9</sup> and 2 X 10 <sup>11</sup>              |               |                      |
| Identity                              | FACs                             | > 80 % CD3+ on REP cells                                      |               |                      |
| TIL potency <sup>2</sup>              | OKT3-stimulated IFN release      | >200 pg/ml per 10 <sup>5</sup> cells and > 2 times background |               |                      |
| Microbiological studies               | aerobic culture <sup>5</sup>     | no growth                                                     |               |                      |
|                                       | anaerobic culture <sup>5</sup>   | no growth                                                     |               |                      |
|                                       | gram stain <sup>1,3</sup>        | no micro-organisms seen                                       |               |                      |
|                                       | aerobic culture <sup>3,4</sup>   | no growth                                                     |               |                      |
|                                       | fungal culture <sup>3,4</sup>    | no growth                                                     |               |                      |
|                                       | anaerobic culture <sup>3,4</sup> | no growth                                                     |               |                      |
|                                       | mycoplasma test <sup>2</sup>     | negative                                                      |               |                      |
| Endotoxin <sup>1</sup>                | limulus assay                    | #5 E.U./kg                                                    |               |                      |
| Presence of tumor cells <sup>2</sup>  | Cytopathology                    | No tumor cells per 200 cells examined                         |               |                      |

<sup>1</sup> Performed on the final product prior to infusion. Results are available at the time of infusion.

<sup>2</sup> Performed 2 - 10 days prior to infusion (test performed prior to final manipulation). Results are available at the time of infusion.

<sup>3</sup> Performed 2-4 days prior to infusion. Results are available at the time of infusion but may not be definitive.

<sup>4</sup> Sample for test collected on the final product prior to infusion. Results will not be available before cells are infused into the patient.

<sup>5</sup> Sample for test collected on the in process cells prior to the REP. Results will be available before cells are infused into the patient.

Prepared by: \_\_\_\_\_

Date: \_\_\_\_\_

QC sign-off: \_\_\_\_\_

Date: \_\_\_\_\_

James C. Yang, M.D. or designee

## Appendix 2

### **Modification of Dose Calculations\* in Patients whose BMI is > 35**

Unless otherwise specified in this protocol, actual body weight is used for dose calculations of treatment agents. In patients who are determined to be obese (BMI > 35), the **practical weight** (see 3 below) will be used.

#### 1. BMI Determination:

$$\text{BMI} = \text{weight (kg)} / [\text{height (m)}]^2$$

#### 2. Calculation of ideal body weight

**Male** = 50 kg + 2.3 (number of inches over 60 inches)

Example: ideal body weight of 5'10" male

$$50 + 2.3 (10) = 73 \text{ kg}$$

**Female** = 45.5 kg + 2.3 (number of inches over 60 inches)

Example: ideal body weight of 5'3" female

$$45.5 + 2.3 (3) = 57 \text{ kg}$$

#### 3. Calculation of "practical weight"

Calculate the average of the actual and the ideal body weights. This is the practical weight to be used in calculating the doses of chemotherapy and associated agents designated in the protocol.

\*Practical weight will NOT be used in the calculation of dose for aldesleukin.

### Appendix 3

#### ADVERSE EVENTS OCCURRING IN ≥10% OF PATIENTS TREATED WITH ALDESLEUKIN (n=525)<sup>1</sup>

| Body System                          | % Patients | Body System                                | % Patients |
|--------------------------------------|------------|--------------------------------------------|------------|
| <u>Body as a Whole</u>               |            | <u>Metabolic and Nutritional Disorders</u> |            |
| Chills                               | 52         | Bilirubinemia                              | 40         |
| Fever                                | 29         | Creatinine increase                        | 33         |
| Malaise                              | 27         | Peripheral edema                           | 28         |
| Asthenia                             | 23         | SGOT increase                              | 23         |
| Infection                            | 13         | Weight gain                                | 16         |
| Pain                                 | 12         | Edema                                      | 15         |
| Abdominal pain                       | 11         | Acidosis                                   | 12         |
| Abdomen enlarged                     | 10         | Hypomagnesemia                             | 12         |
| <u>Cardiovascular</u>                |            | Hypocalcemia                               | 11         |
| Hypotension                          | 71         | Alkaline phosphatase incr                  | 10         |
| Tachycardia                          | 23         | <u>Nervous</u>                             |            |
| Vasodilation                         | 13         | Confusion                                  | 34         |
| Supraventricular tachycardia         | 12         | Somnolence                                 | 22         |
| Cardiovascular disorder <sup>a</sup> | 11         | Anxiety                                    | 12         |
| Arrhythmia                           | 10         | Dizziness                                  | 11         |
| <u>Digestive</u>                     |            | <u>Respiratory</u>                         |            |
| Diarrhea                             | 67         | Dyspnea                                    | 43         |
| Vomiting                             | 50         | Lung disorder <sup>b</sup>                 | 24         |
| Nausea                               | 35         | Respiratory disorder <sup>c</sup>          | 11         |
| Stomatitis                           | 22         | Cough increase                             | 11         |
| Anorexia                             | 20         | Rhinitis                                   | 10         |
| Nausea and vomiting                  | 19         | <u>Skin and Appendages</u>                 |            |
| <u>Hemic and Lymphatic</u>           |            | Rash                                       | 42         |
| Thrombocytopenia                     | 37         | Pruritus                                   | 24         |
| Anemia                               | 29         | Exfoliative dermatitis                     | 18         |
| Leukopenia                           | 16         | <u>Urogenital</u>                          |            |
|                                      |            | Oliguria                                   | 63         |

a Cardiovascular disorder: fluctuations in blood pressure, asymptomatic ECG changes, CHF.

b Lung disorder: physical findings associated with pulmonary congestion, rales, rhonchi.

c Respiratory disorder: ARDS, CXR infiltrates, unspecified pulmonary changes.

<sup>1</sup>Source: Proleukin<sup>®</sup> Prescribing Information – June 2007

## Appendix 4

### Expected Aldesleukin Toxicities and their Management

| Expected toxicity                | Expected grade | Supportive Measures                                                                                                                                               | Stop Cycle*                                                    | Stop Treatment ** |
|----------------------------------|----------------|-------------------------------------------------------------------------------------------------------------------------------------------------------------------|----------------------------------------------------------------|-------------------|
| Chills                           | 3              | IV Meperidine 25-50 mg, IV q1h, prn,                                                                                                                              | No                                                             | No                |
| Fever                            | 3              | Acetaminophen 650 mg, po, q4h; Indomethicin 50-75 mg, po, q8h                                                                                                     | No                                                             | No                |
| Pruritis                         | 3              | Hydroxyzine HCL 10-20 mg po q6h, prn;<br>Diphenhydramine HCL25-50 mg, po, q4h, prn                                                                                | No                                                             | No                |
| Nausea/<br>Vomiting/<br>Anorexia | 3              | Ondansetron 10 mg, IV, q8h, prn; Granisetron 0.01 mg/kg IV daily prn;<br>Droperidol 1 mg, IV q4-6h, prn; Prochlorperazine 25 mg q4h p.r., prn or 10 mg IV q6h prn | No                                                             | No                |
| Diarrhea                         | 3              | Loperamide 2mg, po, q3h, prn; Diphenoxylate HCl 2.5 mg and atropine sulfate 25 mcg, po, q3h, prn; codeine sulfate 30-60 mg, po, q4h, prn                          | If uncontrolled after 24 hours despite all supportive measures | No                |
| Malaise                          | 3 or 4         | Bedrest interspersed with activity                                                                                                                                | If other toxicities occur simultaneously                       | No                |
| Hyperbilirubinemia               | 3 or 4         | Observation                                                                                                                                                       | If other toxicities occur simultaneously                       | No                |
| Anemia                           | 3 or 4         | Transfusion with PRBCs                                                                                                                                            | If uncontrolled despite all supportive measures                | No                |
| Thrombocytopenia                 | 3 or 4         | Transfusion with platelets                                                                                                                                        | If uncontrolled despite all supportive measures                | No                |
| Edema/Weight gain                | 3              | Diuretics prn                                                                                                                                                     | No                                                             | No                |
| Hypotension                      | 3              | Fluid resuscitation<br>Vasopressor support                                                                                                                        | If uncontrolled despite all                                    | No                |

|                          |        |                                                                                                      |                                                 |                                                                      |
|--------------------------|--------|------------------------------------------------------------------------------------------------------|-------------------------------------------------|----------------------------------------------------------------------|
|                          |        |                                                                                                      | supportive measures                             |                                                                      |
| Dyspnea                  | 3 or 4 | Oxygen or ventilatory support                                                                        | If requires ventilatory support                 | No                                                                   |
| Oliguria                 | 3 or 4 | Fluid boluses or dopamine at renal doses                                                             | If uncontrolled despite all supportive measures | No                                                                   |
| Increased creatinine     | 3 or 4 | Observation                                                                                          | Yes (grade 4)                                   | No                                                                   |
| Renal failure            | 3 or 4 | Dialysis                                                                                             | Yes                                             | Yes                                                                  |
| Pleural effusion         | 3      | Thoracentesis                                                                                        | If uncontrolled despite all supportive measures | No                                                                   |
| Bowel perforation        | 3      | Surgical intervention                                                                                | Yes                                             | Yes                                                                  |
| Confusion                | 3      | Observation                                                                                          | Yes                                             | No                                                                   |
| Somnolence               | 3 or 4 | Intubation for airway protection                                                                     | Yes                                             | Yes                                                                  |
| Arrhythmia               | 3      | Correction of fluid and electrolyte imbalances; chemical conversion or electrical conversion therapy | If uncontrolled despite all supportive measures | No                                                                   |
| Elevated Troponin levels | 3 or 4 | Observation                                                                                          | Yes                                             | If changes in LV function have not improved to baseline by next dose |
| Myocardial Infarction    | 4      | Supportive care                                                                                      | Yes                                             | Yes                                                                  |
| Elevated transaminases   | 3 or 4 | Observation                                                                                          | For grade 4 without liver metastases            | If changes have not improved to baseline by next dose                |
| Electrolyte imbalances   | 3 or 4 | Electrolyte replacement                                                                              | If uncontrolled despite all supportive measures | No                                                                   |
| Neutropenia              | 4      | Observation                                                                                          | No                                              | No                                                                   |

\*Unless the toxicity is not reversed within 12 hours

\*\* Unless the toxicity is not reversed to grade 2 or less by next re-treatment.

## 10 Reference List

### Reference List

1. Jemal,A., R.Siegel, E.Ward, T.Murray, J.Xu, and M.J.Thun. 2007. Cancer statistics, 2007. *CA Cancer J.Clin.* 57:43-66.
2. Atkins,M.B., L.Kunkel, M.Sznol, and S.A.Rosenberg. 2000. High-dose recombinant interleukin-2 therapy in patients with metastatic melanoma: long-term survival update. *Cancer J.Sci.Am.* 6 Suppl 1:S11-S14.
3. Gogas,H.J., j.M.Kirkwood, and V.K.Sondak. 2007. Chemotherapy for metastatic melanoma: time for a change? *Cancer* 109:455-464.
4. Wunderlich,J.R. and R.J.Hodes. 1991. Principles of tumor immunity: Biology of cellular immune responses. *Biologic Therapy of Cancer, DeVita, Hellman and Rosenberg, eds.*3-21.
5. Dudley,M.E., J.C.Yang, R.Sherry, M.S.Hughes, R.Royal, U.Kammula, P.F.Robbins, J.Huang, D.E.Citrin, S.F.Leitman, J.Wunderlich, N.P.Restifo, A.Thomasian, S.G.Downey, F.O.Smith, J.Klapper, K.Morton, C.Laurencot, D.E.White, and S.A.Rosenberg. 2008. Adoptive cell therapy for patients with metastatic melanoma: Evaluation of intensive myeloablative chemoradiation preparative regimens. *J.Clin.Oncol.* 26:5233-5239.
6. Rosenberg,S.A., J.R.Yannelli, J.C.Yang, S.L.Topalian, D.J.Schwartzentruber, J.S.Weber, D.R.Parkinson, C.A.Seipp, and D.E.White. 1994. Treatment of patients with metastatic melanoma using autologous tumor-infiltrating lymphocytes and interleukin-2. *J Natl Cancer Inst* 86:1159-1166.
7. Rufer,N., W.Dragowska, G.Thornbury, E.Roosnek, and P.M.Lansdorp. 1998. Telomere length dynamics in human lymphocyte subpopulations measured by flow cytometry. *Nat.Biotechnol.* 16:743-747.
8. Reed,J.R., M.Vukmanovic-Stejic, J.M.Fletcher, M.V.Soaes, J.E.Cook, C.H.Orteu, S.E.Jackson, K.E.Birch, G.R.Foster, M.Salmon, P.C.Beverley, M.H.Rustin, and A.N.Akbar. 2004. Telomere erosion in memory T cells induced by telomerase inhibition at the site of antigenic challenge in vivo. *J.Exp.Med.* 199:1433-1443.
9. Blackburn,E.H. 2001. Switching and signaling at the telomere. *Cell* 106:661-673.
10. de Lange,T. 2002. Protection of mammalian telomeres. *Oncogene* 21:532-540.
11. Zhou,J., X.Shen, R.J.Hodes, S.A.Rosenberg, and P.Robbins. 2005. Telomere length of transferred lymphocytes correlates with in vivo persistence and tumor regression in melanoma patients receiving cell transfer therapy. *J.Immunol.* 175:7046-7052.
12. Tran,K.Q., J.Zhou, K.H.Durflinger, M.M.Langham, T.E.Shelton, J.R.Wunderlich, P.F.Robbins, S.A.Rosenberg, and M.E.Dudley. 2008. Minimally cultured tumor-infiltrating

lymphocytes display optimal characteristics for adoptive cell therapy. *J.Immunother.* 31:742-751.

13. Hendriks,J., Y.Xiao, and J.Borst. 2003. CD27 promotes survival of activated T cells and complements CD28 in generation and establishment of the effector T cell pool. *J.Exp.Med.* 198:1369-1380.
14. Huang,J., K.W.Kerstann, M.Ahmadzadeh, Y.F.Li, M.El-Gamil, S.A.Rosenberg, and P.F.Robbins. 2006. Modulation by IL-2 of CD70 and CD27 expression on CD8+ T cells: importance for the therapeutic effectiveness of cell transfer immunotherapy. *J.Immunol.* 176:7726-7735.
15. Gattinoni,L., C.A.Klebanoff, D.C.Palmer, C.Wrzesiniski, K.Kerstann, Z.Yu, S.E.Finkelstein, M.R.Theoret, S.A.Rosenberg, and N.P.Restifo. 2005. Acquisition of full effector function in vitro paradoxically impairs the in vivo antitumor efficacy of adoptively transferred CD8+ T cells. *J.Clin.Invest.* 115:1616-1626.
